# Supplementary material
Source: PubMed Central journal article supplement (PMC4605818)

### Supplementary Figure 1

Distribution of XFS cases (number in red) and controls (number in black) from all participating sites.

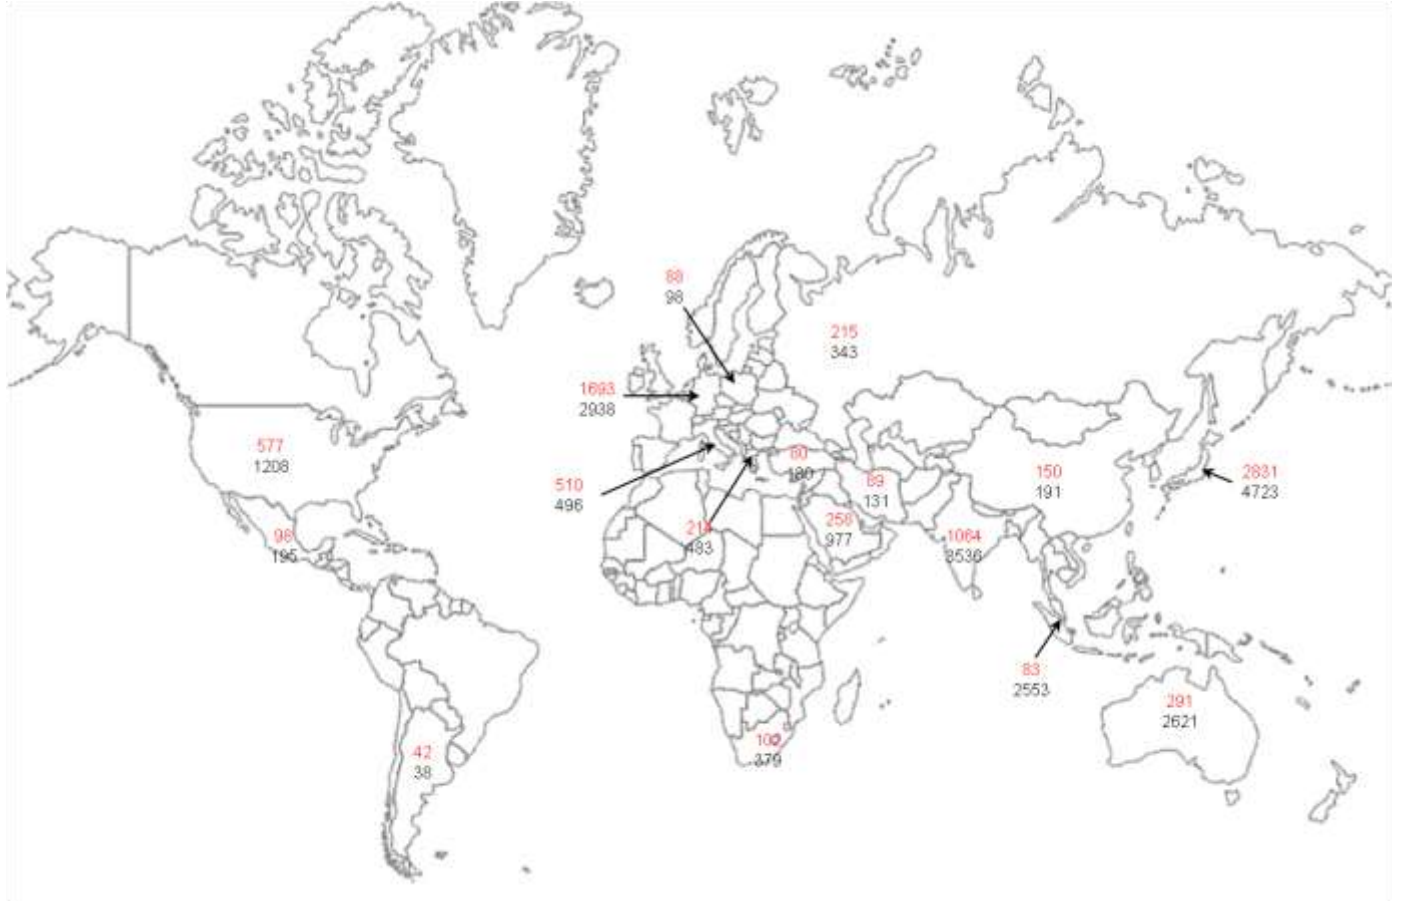

Supplement: NIHMS677372-supplement-Supplemental_figure_1.pdf [file NIHMS677372-supplement-Supplemental_figure_1.pdf]
