# Supplementary material
Source: PubMed Central journal article supplement (PMC4605818)

## Supplementary Figure 2

Ancestry analysis of the GWAS dataset using principal components. Panel a) shows the ancestry of the XFS cases and controls from Japan relative to the international HapMap panels. Panel b) shows direct genetic ancestral matching between the Japanese XFS cases and controls.

a)

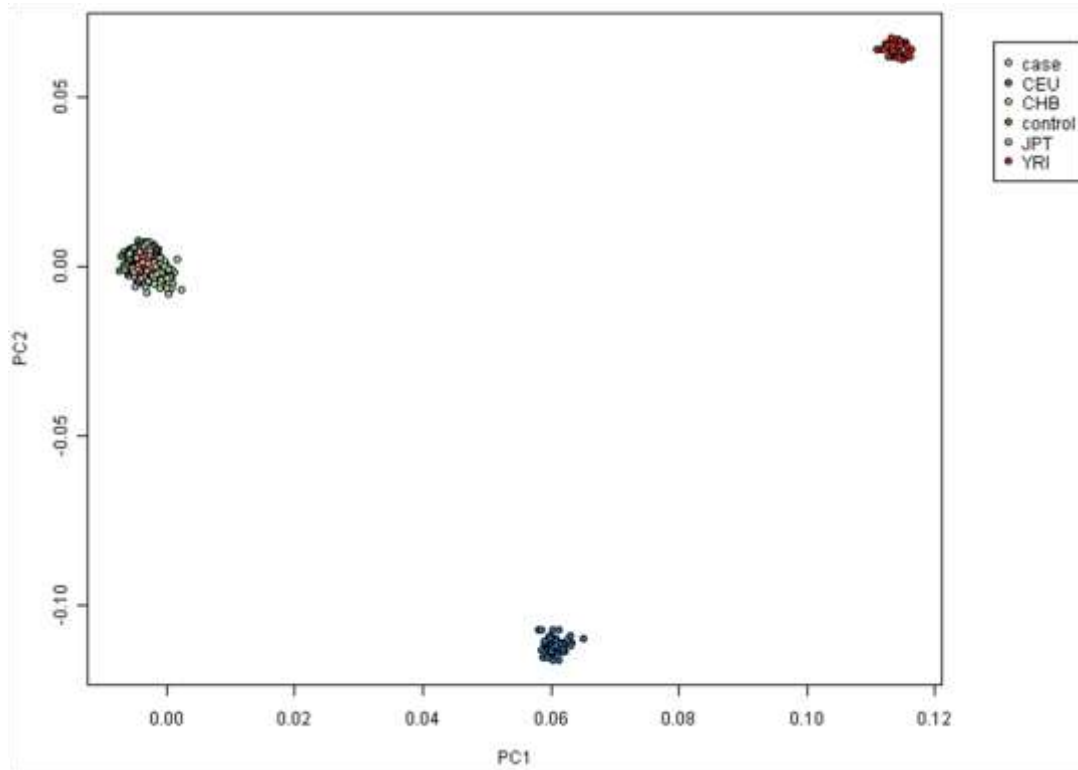

b)

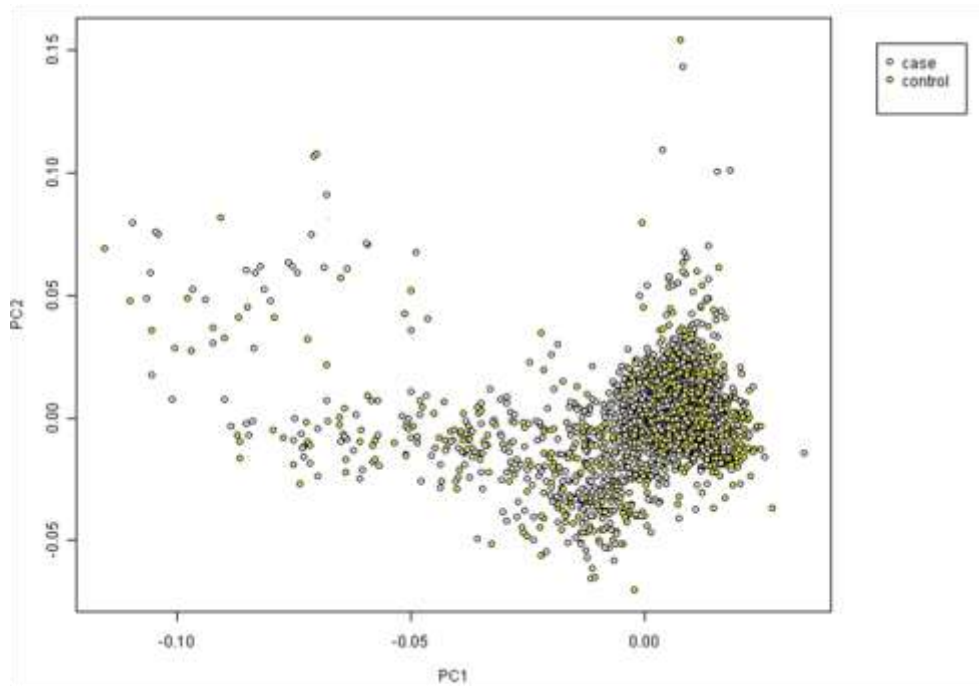

Supplement: NIHMS677372-supplement-Supplemental_figure_2.pdf [file NIHMS677372-supplement-Supplemental_figure_2.pdf]
