# Supplementary material
Source: PubMed Central journal article supplement (PMC4605818)

### Supplementary Figure 3

Quantile-quantile plot of the GWAS discovery stage  $P$ -values. No genomic inflation was observed.

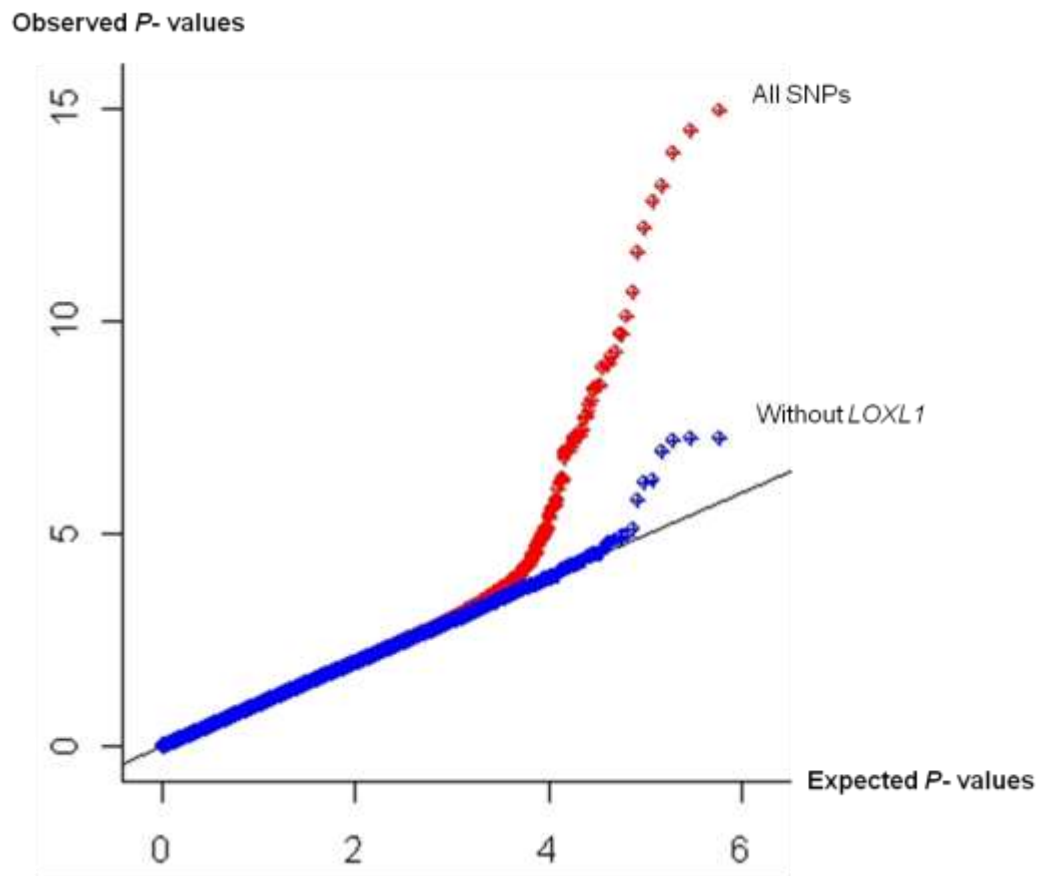

Supplement: NIHMS677372-supplement-Supplemental_figure_3.pdf [file NIHMS677372-supplement-Supplemental_figure_3.pdf]
