# Supplementary material
Source: PubMed Central journal article supplement (PMC4605818)

#### Supplementary Figure 4

Quantile-quantile plot of the discovery stage  $P$ -values contrasting patients with exfoliation syndrome without glaucoma ( $N = 788$ ) against patients presenting with exfoliation syndrome accompanied by glaucoma ( $N = 594$ ). A total of 102 exfoliation syndrome cases did not have the glaucoma sub-diagnosis.

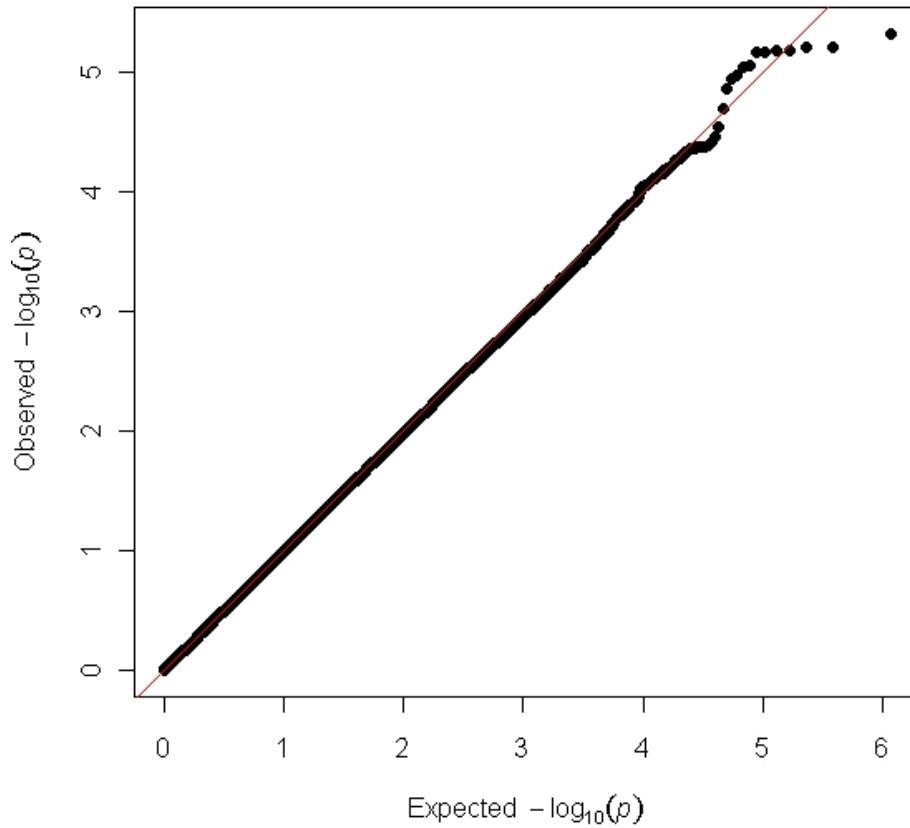

Supplement: NIHMS677372-supplement-Supplemental_figure_4.pdf [file NIHMS677372-supplement-Supplemental_figure_4.pdf]
