# Supplementary material
Source: PubMed Central journal article supplement (PMC4605818)

### Supplementary Figure 5

Manhattan plots for the genome-wide association study on exfoliation syndrome showing

a) Discovery phase (N = 1,484 cases and 1,188 controls) data only and

b) meta-analysis of the discovery and validation (stage 1) phases comprising up to N = 4,112 cases and N = 10,135 controls. *CACNA1A* rs4926244 was brought forward for replication (stage 2).

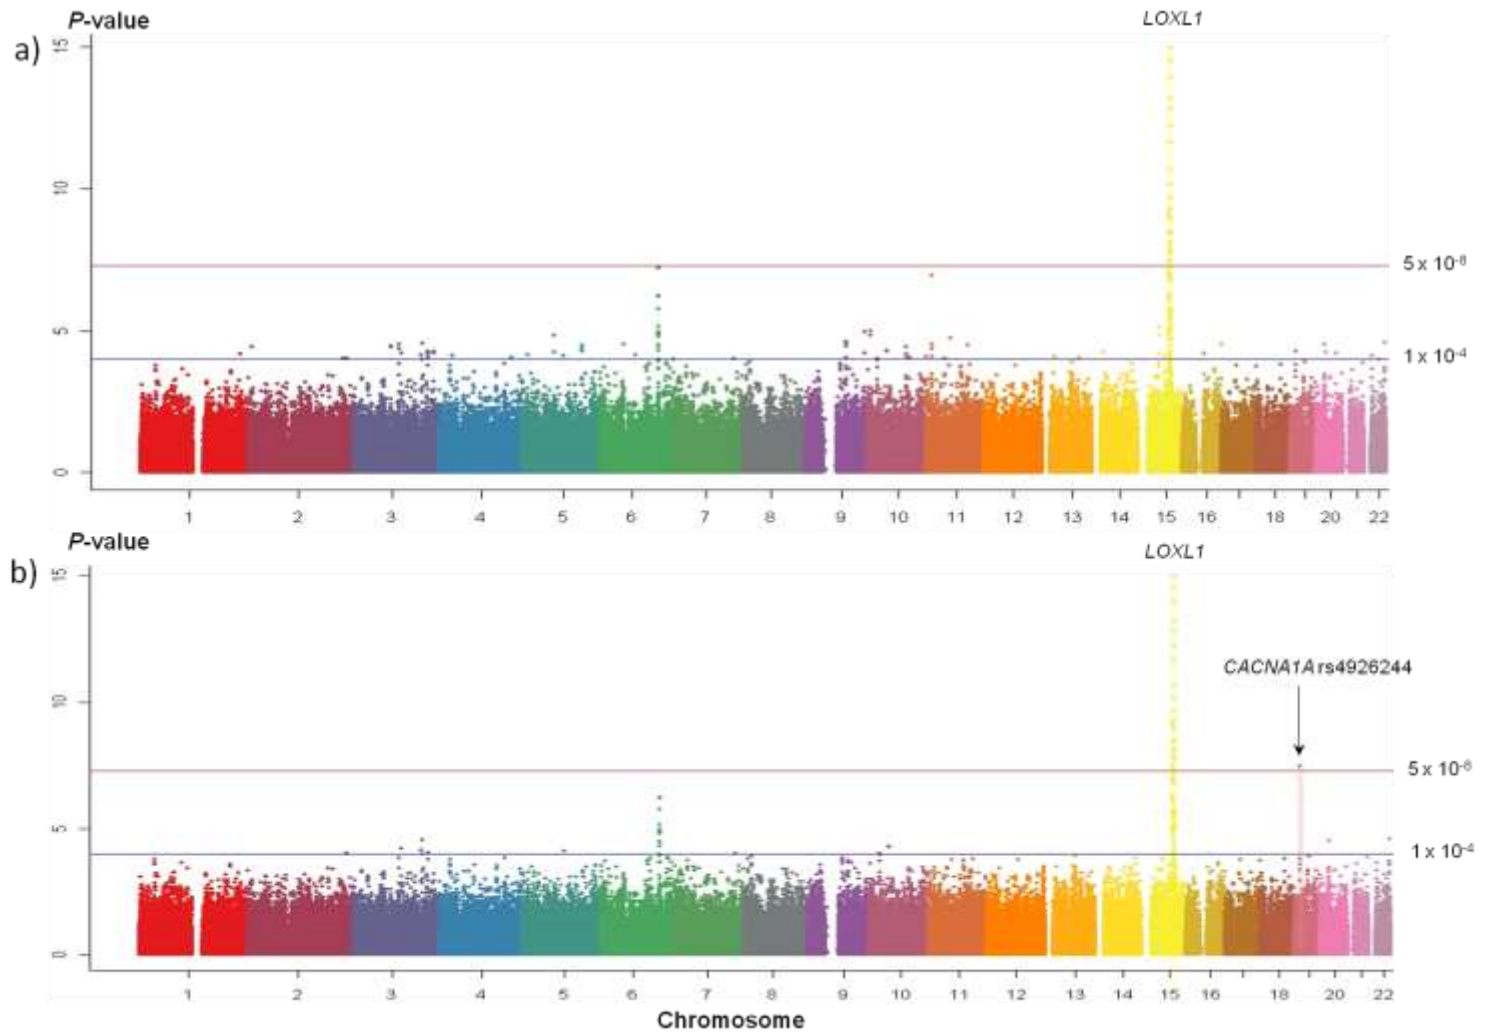

Supplement: NIHMS677372-supplement-Supplemental_figure_5.pdf [file NIHMS677372-supplement-Supplemental_figure_5.pdf]
