# Supplementary material
Source: PubMed Central journal article supplement (PMC4605818)

## Supplementary Figure 6

Regional association analysis of the *CACNA1A* locus. The genomic locations of the genes flanking *CACNA1A* are also shown. The locations for rs4926244, T666M, and R583Q are shown in the context of *CACNA1A*. *P*-values on the y axis are truncated at  $P < 1 \times 10^{-10}$ .

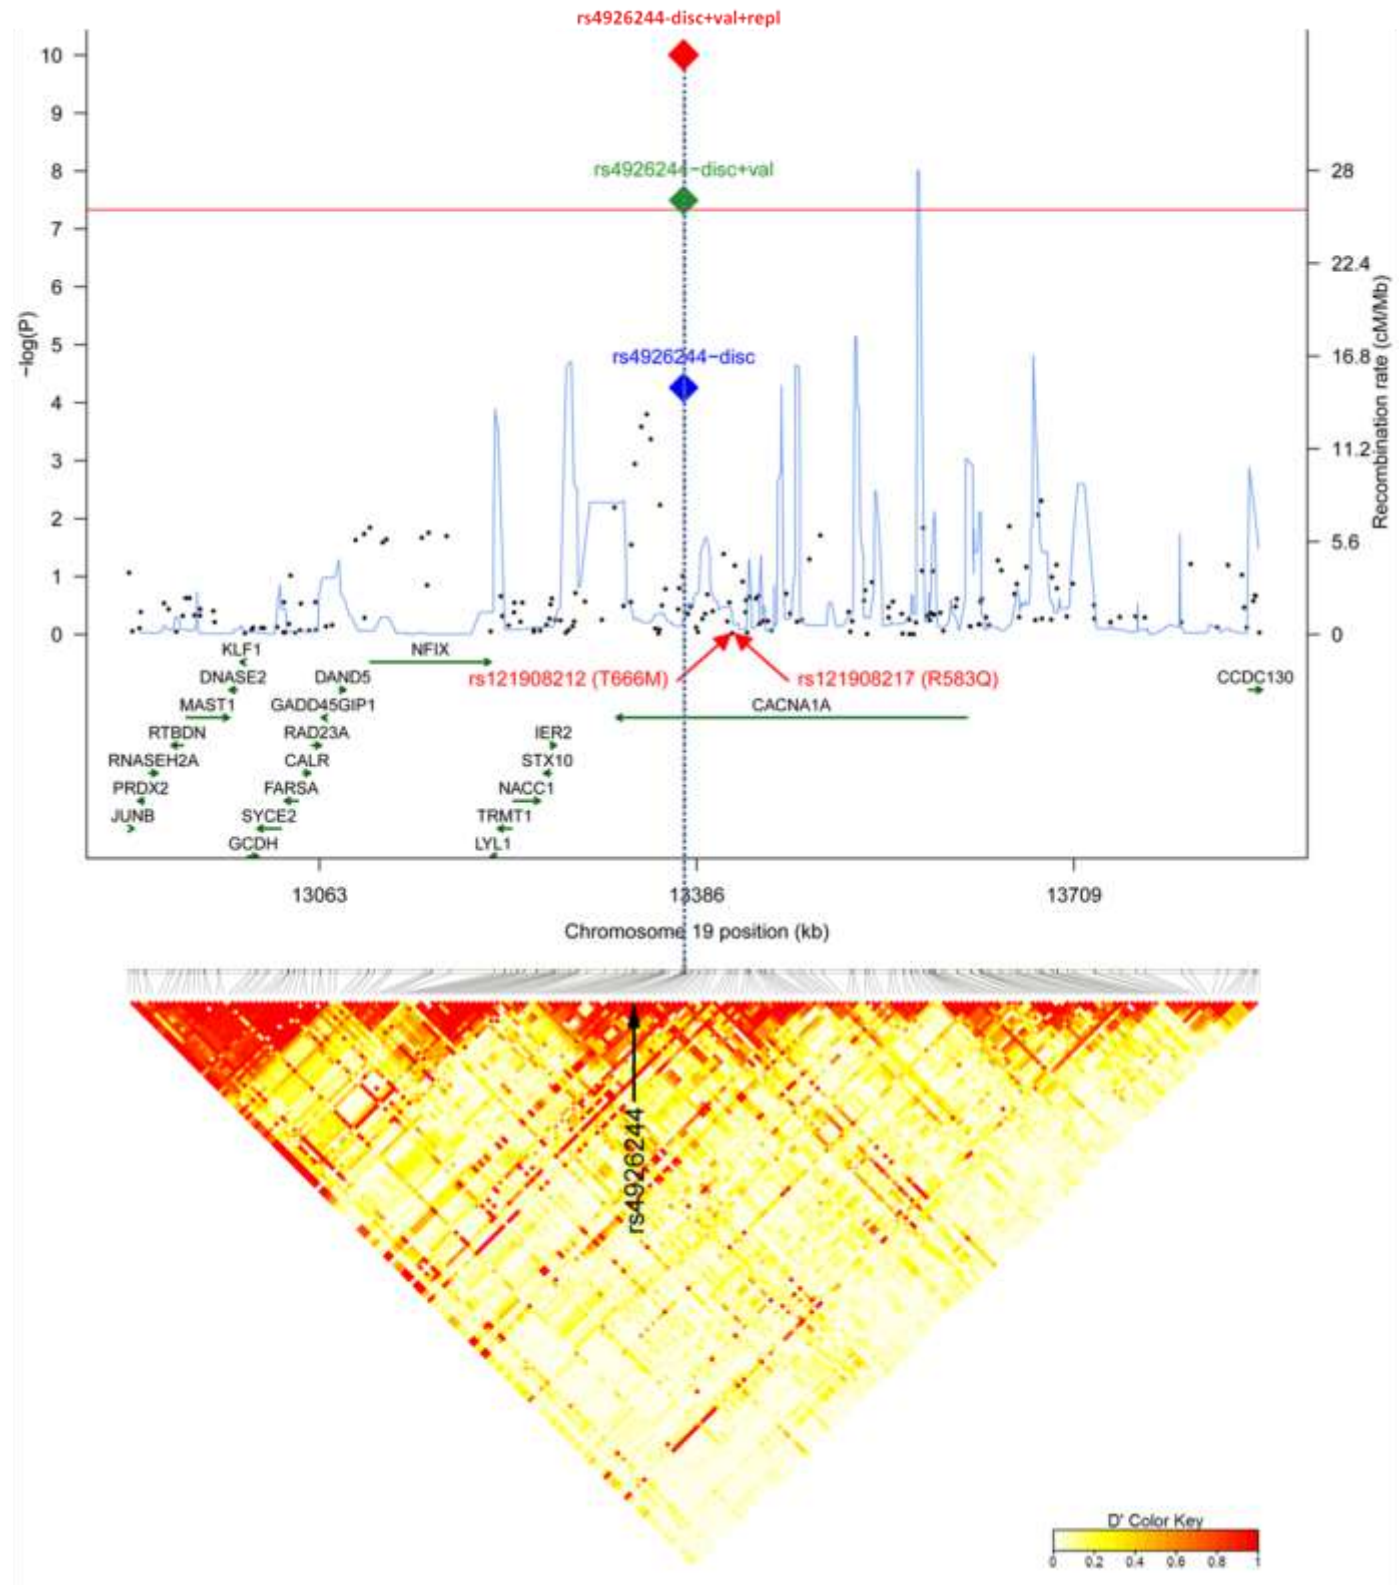

Supplement: NIHMS677372-supplement-Supplemental_figure_6.pdf [file NIHMS677372-supplement-Supplemental_figure_6.pdf]
