# Supplementary material
Source: PubMed Central journal article supplement (PMC4605818)
Supplement: NIHMS677372-supplement-Supplemental_figure_7.pdf [file NIHMS677372-supplement-Supplemental_figure_7.pdf]

## Supplementary Figure 7

Regional association plot of the *CACNA1A* locus for SNP markers imputed using cosmopolitan population haplotypes based on data from 2535 individuals from 26 distinct populations around the world obtained from the 1000 Genomes project Phase 3 (Jun 2014) release for reference panel construction. No imputed genetic marker showed evidence of association surpassing the directly genotyped rs4926244.

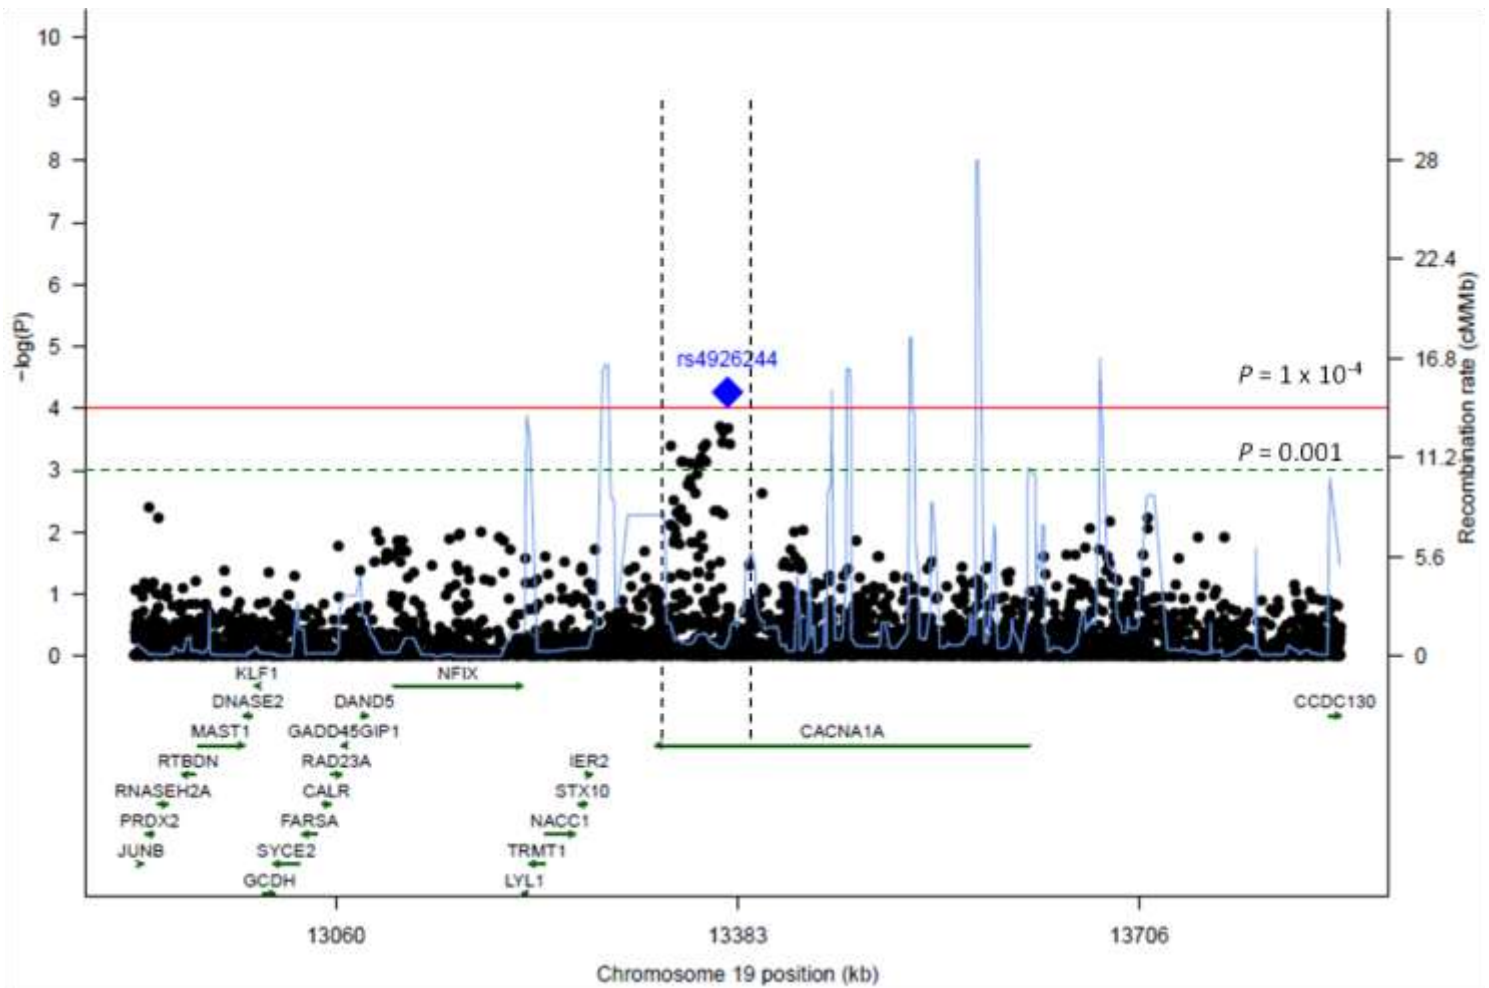

A total of 17 imputed SNPs at the *CACNA1A* locus show  $P < 0.001$  in terms of association with XFS. The individual SNP IDs and correlation with rs4926244 are appended in **Supplementary Table 5**. The dashed vertical lines mark regions of recombination flanking rs4926244 and the 17 SNPs correlated with it.
