# Supplementary material
Source: PubMed Central journal article supplement (PMC4605818)

### Supplementary Figure 8

Forest plot for the associations between *LOXL1* rs4886776 and Exfoliation syndrome in the discovery and Stage 1 follow up sample collections. The black lines denote the 95% confidence intervals of the odds ratio for each collection. The blue diamonds denote the 95% confidence interval for summary observations for Japan, non-Japan, and overall meta-analysis.

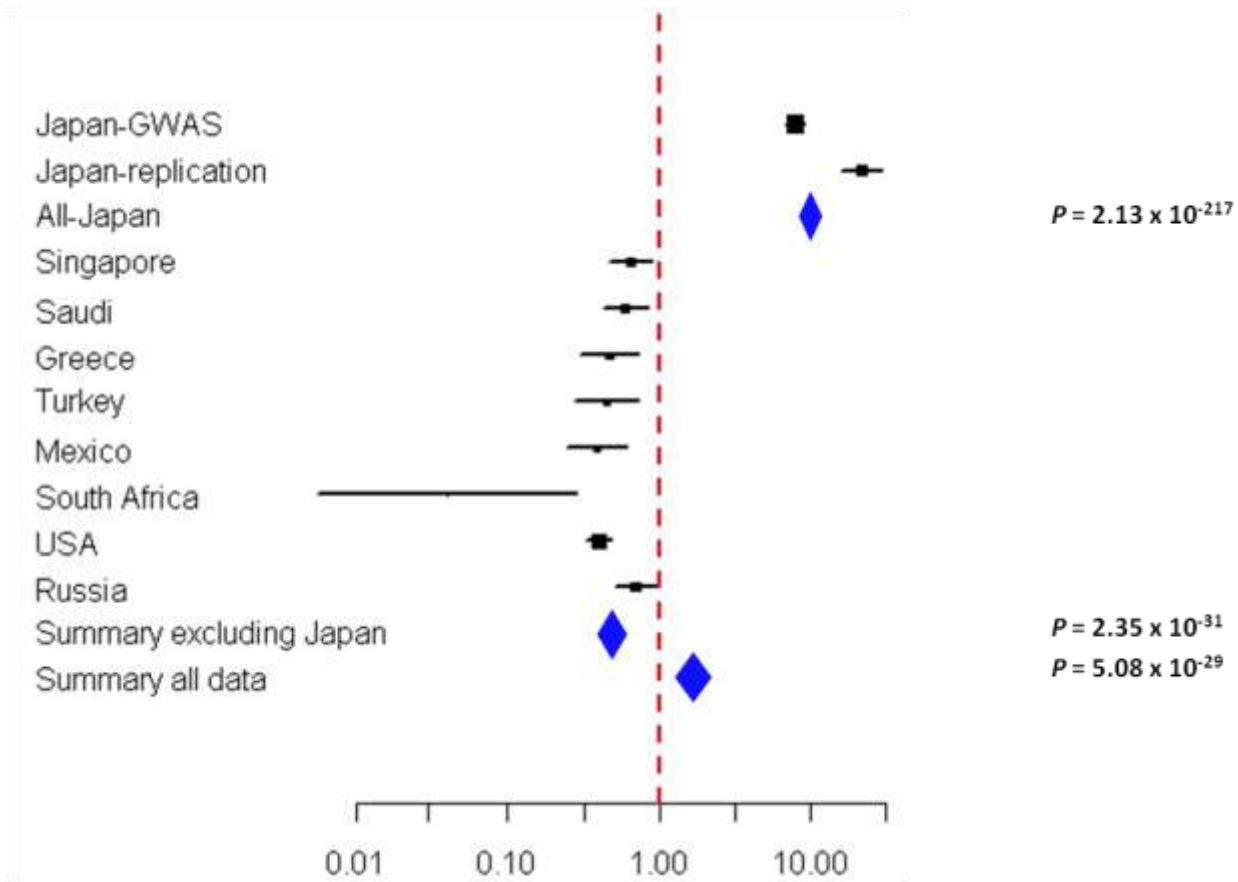

Supplement: NIHMS677372-supplement-Supplemental_figure_8.pdf [file NIHMS677372-supplement-Supplemental_figure_8.pdf]
