# Supplementary material
Source: PubMed Central journal article supplement (PMC4605818)

## Supplementary Figure 12

A to C, XFS human eyes: CACNA1 Immunohistochemistry staining (1:100k Abcam, red chromophore) of 3 PXF globes. Ciliary body (A&B) and ciliary processes (A to C) show positive staining at low magnification. (20x). Asterix (\*) highlights the non-staining Exfoliative material along the zonules and ciliary processes. Zonules show focal staining for CACANA1 (arrow).

D & E, XFS human eyes: CACNA1 immunohistochemistry showing the positive staining of the non pigmented ciliary epithelium (NPCE) and pigmented ciliary epithelium (PCE) and ciliary body smooth muscles. (40x). Asterix (\*) highlights the non-staining Exfoliative material.

F & G, Normal human eyes: CACNA1A immunohistochemistry showing the positive staining of the non pigmented ciliary epithelium (NPCE) and pigmented ciliary epithelium (PCE) and ciliary body smooth muscles.

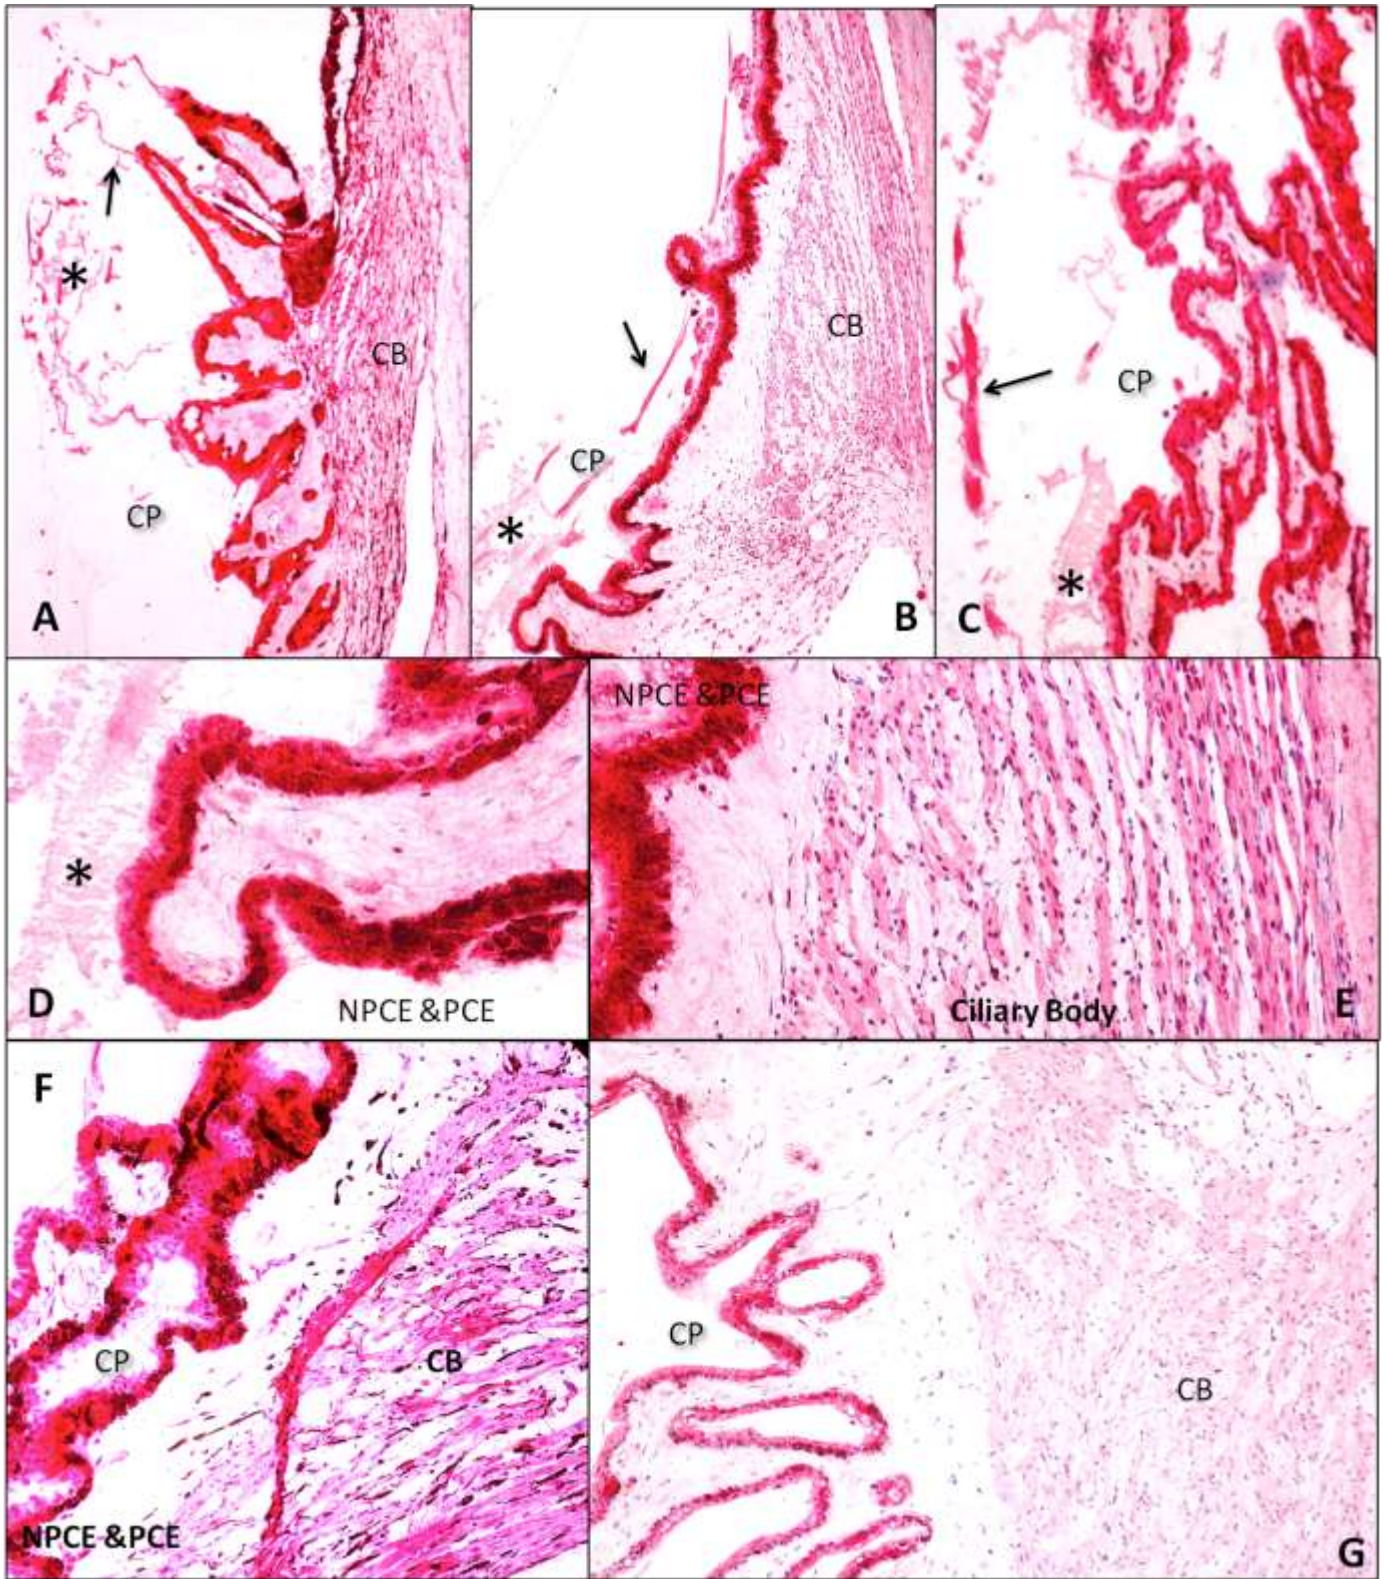

Supplement: NIHMS677372-supplement-Supplemental_figure_12.pdf [file NIHMS677372-supplement-Supplemental_figure_12.pdf]
