# Supplementary material
Source: PubMed Central journal article supplement (PMC4605818)
Supplement: NIHMS677372-supplement-Supplemental_table_1.pdf [file NIHMS677372-supplement-Supplemental_table_1.pdf]

**Supplementary Table 1**

Sample collections for Exfoliation syndrome cases and controls for the GWAS, validation (Stage 1 follow up), and replication (Stage 2 follow up) phases.

| <b>Patient Collection</b>          | <b>N Cases</b> | <b>N Controls</b> |
|------------------------------------|----------------|-------------------|
| <b>GWAS</b>                        |                |                   |
| Japan - discovery                  | 1484           | 1188              |
| <b>Validation (Stage 1)</b>        |                |                   |
| Japan - validation                 | 1001           | 2629              |
| Singapore                          | 83             | 2553              |
| Saudi Arabia                       | 258            | 977               |
| Greece                             | 214            | 483               |
| Turkey                             | 80             | 180               |
| Mexico                             | 98             | 195               |
| South African                      | 102            | 379               |
| United States                      | 577            | 1208              |
| Russia                             | 215            | 343               |
| <b>Total Stage 1 (Validation)</b>  | <b>2628</b>    | <b>8947</b>       |
| <b>Replication (Stage 2)</b>       |                |                   |
| Australia                          | 291            | 2621              |
| India                              | 1064           | 3536              |
| Japan - replication                | 346            | 906               |
| Germany                            | 1693           | 3763              |
| Italy                              | 510            | 496               |
| China-Beijing                      | 100            | 142               |
| China-Xinjiang                     | 50             | 49                |
| Iran                               | 89             | 131               |
| Poland                             | 88             | 98                |
| Argentina                          | 42             | 38                |
| <b>Total Stage 2 (Replication)</b> | <b>4273</b>    | <b>11780</b>      |
| <b>Total all samples</b>           | <b>8385</b>    | <b>21915</b>      |
