# Supplementary material
Source: PubMed Central journal article supplement (PMC4605818)
Supplement: NIHMS677372-supplement-Supplemental_table_2.pdf [file NIHMS677372-supplement-Supplemental_table_2.pdf]

## Supplementary Table 2

Association results for the 67 SNPs which surpassed  $P < 1 \times 10^{-4}$  at the discovery stage and brought forward to the validation stage (see **Supplementary table 1** for patient collections in the validation stage).

| CHR | SNP        | BP        | A1 | F_A     | F_U     | A2 | OR <sub>GWAS</sub> | P <sub>GWAS</sub> | OR <sub>Val</sub> | P <sub>Val</sub> | OR <sub>GWAS+Val</sub> | P <sub>GWAS+Val</sub> |
|-----|------------|-----------|----|---------|---------|----|--------------------|-------------------|-------------------|------------------|------------------------|-----------------------|
| 1   | rs203745   | 231441424 | G  | 0.06739 | 0.0973  | A  | 0.68               | 6.62E-05          | 1.14              | 0.23             | 0.87                   | 0.063                 |
| 2   | rs6759998  | 8537949   | G  | 0.2642  | 0.2155  | A  | 1.26               | 3.72E-05          | 0.96              | 0.34             | 1.04                   | 0.25                  |
| 2   | rs750764   | 220781006 | A  | 0.5232  | 0.4701  | G  | 1.24               | 9.15E-05          | 0.99              | 0.84             | 1.07                   | 0.041                 |
| 3   | rs2043663  | 87038154  | G  | 0.3231  | 0.271   | A  | 1.24               | 3.66E-05          | 1.03              | 0.56             | 1.10                   | 0.011                 |
| 3   | rs2575775  | 87042798  | A  | 0.312   | 0.2603  | G  | 1.23               | 3.47E-05          | 1.00              | 0.94             | 1.08                   | 0.043                 |
| 3   | rs17434624 | 104017741 | G  | 0.1823  | 0.2306  | A  | 0.75               | 3.07E-05          | 0.96              | 0.41             | 0.90                   | 0.0033                |
| 3   | rs2895281  | 104019345 | A  | 0.1819  | 0.2294  | C  | 0.75               | 4.25E-05          | 0.98              | 0.70             | 0.91                   | 0.012                 |
| 3   | rs16856870 | 171794511 | G  | 0.353   | 0.2953  | A  | 1.28               | 5.86E-05          | 1.00              | 1.00             | 1.14                   | 0.0035                |
| 3   | rs7620170  | 171808897 | G  | 0.4184  | 0.4735  | A  | 0.80               | 6.53E-05          | 1.00              | 0.95             | 0.92                   | 0.016                 |
| 3   | rs6790174  | 171872996 | C  | 0.3311  | 0.2795  | A  | 1.28               | 5.29E-05          | 1.01              | 0.82             | 1.10                   | 0.0091                |
| 3   | rs6770501  | 184335641 | G  | 0.2675  | 0.3157  | A  | 0.78               | 6.13E-05          | 1.09              | 0.054            | 0.97                   | 0.40                  |
| 3   | rs13085530 | 184337818 | A  | 0.2675  | 0.3161  | G  | 0.78               | 5.21E-05          | 1.08              | 0.072            | 0.97                   | 0.36                  |
| 4   | rs2201945  | 31100499  | C  | 0.4929  | 0.4419  | A  | 1.22               | 7.57E-05          | 0.98              | 0.56             | 1.06                   | 0.11                  |
| 4   | rs17689952 | 166939154 | G  | 0.345   | 0.3003  | A  | 1.26               | 9E-05             | 1.03              | 0.53             | 1.12                   | 0.0039                |
| 5   | rs769714   | 14046910  | G  | 0.4346  | 0.3775  | A  | 1.26               | 6.85E-05          | 1.06              | 0.21             | 1.13                   | 0.00054               |
| 5   | rs10942747 | 75216411  | A  | 0.3597  | 0.415   | G  | 0.79               | 5.58E-05          | 0.96              | 0.32             | 0.90                   | 0.0015                |
| 5   | rs10061050 | 75220355  | A  | 0.3301  | 0.388   | C  | 0.78               | 1.51E-05          | 0.98              | 0.57             | 0.90                   | 0.0025                |
| 5   | rs11957671 | 138012666 | A  | 0.02662 | 0.0101  | G  | 2.66               | 4.37E-05          | 0.91              | 0.11             | 0.97                   | 0.55                  |
| 5   | rs11742397 | 138031907 | A  | 0.02664 | 0.0101  | G  | 2.66               | 4.30E-05          | 0.92              | 0.18             | 0.98                   | 0.75                  |
| 5   | rs1059110  | 138266546 | A  | 0.02763 | 0.01179 | G  | 2.25               | 5.14E-05          | 0.91              | 0.063            | 0.95                   | 0.31                  |
| 5   | rs10057932 | 138401773 | A  | 0.0354  | 0.01684 | G  | 2.06               | 3.33E-05          | 0.94              | 0.57             | 1.13                   | 0.18                  |
| 6   | rs228146   | 55636255  | C  | 0.3857  | 0.3305  | A  | 1.25               | 3.04E-05          | 0.99              | 0.77             | 1.07                   | 0.056                 |
| 6   | rs12207890 | 80670767  | G  | 0.07451 | 0.04798 | A  | 1.54               | 7.05E-05          | 0.87              | 0.031            | 0.99                   | 0.82                  |
| 6   | rs11154801 | 135739355 | A  | 0.1587  | 0.218   | C  | 0.67               | 5.51E-08          | 1.02              | 0.67             | 0.91                   | 0.012                 |
| 6   | rs6908428  | 135793706 | G  | 0.1534  | 0.2117  | A  | 0.67               | 6.47E-08          | 0.99              | 0.90             | 0.89                   | 0.0036                |
| 6   | rs13208505 | 135893723 | A  | 0.155   | 0.2136  | C  | 0.67               | 5.34E-08          | 0.99              | 0.77             | 0.89                   | 0.0020                |
| 6   | rs9295405  | 170704219 | C  | 0.04515 | 0.06818 | A  | 0.62               | 9.78E-05          | 1.03              | 0.64             | 0.94                   | 0.26                  |
| 9   | rs10123208 | 93692988  | A  | 0.1929  | 0.1519  | C  | 1.35               | 9.07E-05          | 0.97              | 0.61             | 1.10                   | 0.040                 |
| 9   | rs10761105 | 93804208  | A  | 0.3683  | 0.4247  | G  | 0.81               | 2.74E-05          | 1.03              | 0.58             | 0.94                   | 0.059                 |
| 9   | rs7027785  | 93824836  | G  | 0.3716  | 0.4285  | A  | 0.81               | 2.46E-05          | 1.00              | 0.93             | 0.92                   | 0.026                 |
| 9   | rs10820830 | 93899625  | C  | 0.2008  | 0.1592  | A  | 1.35               | 3.43E-05          | 1.04              | 0.42             | 1.14                   | 0.0020                |
| 9   | rs511293   | 136577094 | A  | 0.1149  | 0.154   | G  | 0.69               | 1.09E-05          | 1.05              | 0.40             | 0.93                   | 0.11                  |
| 9   | rs10465165 | 136606230 | A  | 0.1016  | 0.1311  | C  | 0.74               | 6.05E-05          | 1.19              | 0.042            | 0.95                   | 0.41                  |
| 10  | rs982015   | 8819367   | C  | 0.05556 | 0.03088 | A  | 1.70               | 1.48E-05          | 1.06              | 0.33             | 1.14                   | 0.021                 |
| 10  | rs420899   | 8831119   | G  | 0.05593 | 0.0308  | A  | 1.70               | 1.03E-05          | 1.02              | 0.76             | 1.11                   | 0.079                 |
| 10  | rs10748533 | 91763487  | A  | 0.336   | 0.388   | G  | 0.81               | 8.32E-05          | 0.98              | 0.57             | 0.91                   | 0.010                 |
| 10  | rs7914961  | 91776003  | G  | 0.316   | 0.3698  | A  | 0.80               | 3.71E-05          | 1.01              | 0.84             | 0.93                   | 0.039                 |
| 10  | rs11185967 | 91777494  | G  | 0.3495  | 0.4028  | A  | 0.81               | 6.48E-05          | 0.92              | 0.16             | 0.86                   | 0.00038               |
| 10  | rs7095551  | 99534780  | G  | 0.03844 | 0.01894 | A  | 2.04               | 9.03E-05          | 0.93              | 0.47             | 1.12                   | 0.20                  |
| 11  | rs7481525  | 378188    | A  | 0.408   | 0.4617  | G  | 0.81               | 8.26E-05          | 0.98              | 0.63             | 0.92                   | 0.012                 |
| 11  | rs10766036 | 13119308  | G  | 0.2898  | 0.2458  | A  | 1.30               | 4.44E-05          | 0.99              | 0.74             | 1.08                   | 0.040                 |
| 11  | rs4451711  | 13120950  | A  | 0.3265  | 0.2769  | G  | 1.29               | 2.97E-05          | 0.97              | 0.51             | 1.09                   | 0.025                 |

|    |            |          |   |         |         |   |      |           |      |          |      |          |
|----|------------|----------|---|---------|---------|---|------|-----------|------|----------|------|----------|
| 11 | rs10766043 | 13135055 | G | 0.2015  | 0.1507  | A | 1.50 | 1.11E-07  | 1.00 | 0.97     | 1.10 | 0.0090   |
| 11 | rs6416166  | 15499846 | A | 0.3793  | 0.4318  | C | 0.80 | 8.42E-05  | 1.00 | 0.98     | 0.93 | 0.026    |
| 11 | rs3094392  | 44063841 | A | 0.2902  | 0.2411  | C | 1.29 | 9.57E-05  | 0.93 | 0.17     | 1.06 | 0.17     |
| 11 | rs11228267 | 56172900 | A | 0.0381  | 0.06271 | G | 0.57 | 1.75E-05  | 1.40 | 0.023    | 0.85 | 0.090    |
| 11 | rs11215465 | 98326293 | A | 0.223   | 0.2723  | C | 0.78 | 3.17E-05  | 1.04 | 0.57     | 0.90 | 0.025    |
| 13 | rs9554330  | 29003444 | A | 0.1597  | 0.2003  | G | 0.75 | 8.16E-05  | 0.95 | 0.36     | 0.89 | 0.0034   |
| 13 | rs17079019 | 85578989 | A | 0.1042  | 0.07323 | G | 1.48 | 8.87E-05  | 1.09 | 0.37     | 1.25 | 0.0012   |
| 14 | rs17111706 | 27243073 | A | 0.1079  | 0.1445  | C | 0.75 | 5.59E-05  | 1.04 | 0.46     | 0.95 | 0.24     |
| 15 | rs11070561 | 47305540 | C | 0.2709  | 0.3187  | A | 0.78 | 6.38E-05  | 1.03 | 0.55     | 0.94 | 0.068    |
| 15 | rs16961587 | 49052809 | G | 0.08227 | 0.1177  | A | 0.71 | 1.50E-05  | 1.02 | 0.87     | 0.81 | 0.0058   |
| 15 | rs9302144  | 49059673 | A | 0.07985 | 0.1162  | G | 0.69 | 7.55E-06  | 1.06 | 0.55     | 0.86 | 0.023    |
| 15 | rs443565   | 62788601 | C | 0.1262  | 0.09141 | A | 1.45 | 7.47E-05  | 0.98 | 0.65     | 1.07 | 0.12     |
| 15 | rs4777505  | 72668539 | A | 0.2018  | 0.1592  | G | 1.33 | 6.29E-05  | 1.07 | 0.34     | 1.18 | 0.0010   |
| 15 | rs4777581  | 73320015 | A | 0.4184  | 0.487   | G | 0.77 | 2.22E-06  | 1.03 | 0.51     | 0.92 | 0.016    |
| 15 | rs6495044  | 73330423 | A | 0.3096  | 0.3746  | G | 0.76 | 4.29E-06  | 0.97 | 0.53     | 0.89 | 0.00096  |
| 15 | rs4886776  | 74224996 | G | 0.1015  | 0.5008  | A | 0.12 | 7.37E-137 | 1.24 | 0.00019  | 0.60 | 9.92E-27 |
| 15 | rs16968809 | 77672118 | G | 0.5007  | 0.4533  | A | 1.28 | 1.92E-05  | 1.11 | 0.025    | 1.18 | 7.91E-06 |
| 16 | rs10193    | 50705747 | C | 0.1329  | 0.1724  | A | 0.74 | 6.07E-05  | 1.06 | 0.50     | 0.88 | 0.025    |
| 16 | rs10459815 | 50718801 | A | 0.1354  | 0.1734  | G | 0.75 | 6.5E-05   | 1.06 | 0.48     | 0.88 | 0.025    |
| 16 | rs12924101 | 89862906 | C | 0.04717 | 0.07365 | A | 0.61 | 2.91E-05  | 0.89 | 0.11     | 0.81 | 0.00049  |
| 19 | rs4926244  | 13374913 | G | 0.2921  | 0.2475  | A | 1.29 | 5.50E-05  | 1.17 | 4.17E-05 | 1.20 | 2.45E-08 |
| 20 | rs6047982  | 22246450 | C | 0.3529  | 0.3008  | A | 1.24 | 5.65E-05  | 0.95 | 0.22     | 1.04 | 0.28     |
| 20 | rs4810755  | 46665169 | A | 0.3922  | 0.339   | G | 1.22 | 6.17E-05  | 0.99 | 0.74     | 1.06 | 0.10     |
| 22 | rs10854554 | 19610682 | G | 0.09737 | 0.1317  | A | 0.72 | 7.88E-05  | 1.07 | 0.19     | 0.96 | 0.43     |
| 22 | rs4821451  | 36296109 | G | 0.4606  | 0.516   | A | 0.80 | 9.87E-05  | 0.97 | 0.54     | 0.90 | 0.0028   |
