# Supplementary material
Source: PubMed Central journal article supplement (PMC4605818)
Supplement: NIHMS677372-supplement-Supplemental_table_3.pdf [file NIHMS677372-supplement-Supplemental_table_3.pdf]

### Supplementary Table 3

Association results for previously reported candidate genes for Exfoliation syndrome.

| CHR | SNP        | BP        | A1 | F_A    | F_U    | A2 | P                    | OR   | Gene           | Reference |
|-----|------------|-----------|----|--------|--------|----|----------------------|------|----------------|-----------|
| 1   | rs6691985  | 17289911  | G  | 0.4482 | 0.4691 | A  | 0.13                 | 0.92 | <i>MFAP2</i>   | 16        |
| 1   | rs3754511  | 17310019  | G  | 0.1429 | 0.1423 | A  | 0.95                 | 1.01 | <i>MFAP2</i>   | 16        |
| 1   | rs3738815  | 17314702  | G  | 0.4761 | 0.4832 | A  | 0.61                 | 0.97 | <i>MFAP2</i>   | 16        |
| 1   | rs2076604  | 17318065  | A  | 0.472  | 0.479  | G  | 0.61                 | 0.97 | <i>MFAP2</i>   | 16        |
| 7   | rs1015932  | 147191337 | A  | 0.3256 | 0.3304 | G  | 0.71                 | 0.98 | <i>CNTNAP2</i> | 10        |
| 7   | rs7781317  | 147201446 | G  | 0.2261 | 0.2163 | A  | 0.39                 | 1.06 | <i>CNTNAP2</i> | 10        |
| 7   | rs971818   | 147203197 | G  | 0.3406 | 0.3429 | A  | 0.86                 | 0.99 | <i>CNTNAP2</i> | 10        |
| 7   | rs10226360 | 147206439 | A  | 0.3608 | 0.3626 | C  | 0.89                 | 0.99 | <i>CNTNAP2</i> | 10        |
| 7   | rs12703926 | 147234727 | A  | 0.2179 | 0.2342 | G  | 0.16                 | 0.91 | <i>CNTNAP2</i> | 10        |
| 7   | rs851821   | 147242624 | G  | 0.4272 | 0.4053 | A  | 0.11                 | 1.09 | <i>CNTNAP2</i> | 10        |
| 7   | rs11975946 | 147311353 | G  | 0.3692 | 0.3866 | A  | 0.19                 | 0.93 | <i>CNTNAP2</i> | 10        |
| 8   | rs3087554  | 27455442  | G  | 0.3364 | 0.3082 | A  | 0.029                | 1.14 | <i>CLU</i>     | 16        |
| 8   | rs11136000 | 27464519  | A  | 0.2668 | 0.2863 | G  | 0.11                 | 0.91 | <i>CLU</i>     | 16        |
| 9   | rs2149356  | 120474199 | A  | 0.3708 | 0.3846 | C  | 0.30                 | 0.94 | <i>TLR4</i>    | 17        |
| 14  | rs2190876  | 74932268  | A  | 0.2089 | 0.2492 | G  | 0.00048 <sup>a</sup> | 0.80 | <i>LTBP2</i>   | 16        |
| 14  | rs2302114  | 74983841  | A  | 0.3935 | 0.3859 | G  | 0.57                 | 1.03 | <i>LTBP2</i>   | 16        |
| 14  | rs3815328  | 74992383  | A  | 0.3763 | 0.3598 | G  | 0.21                 | 1.07 | <i>LTBP2</i>   | 16        |
| 14  | rs3784024  | 75045389  | A  | 0.4215 | 0.3935 | G  | 0.039                | 1.12 | <i>LTBP2</i>   | 16        |
| 14  | rs8014087  | 75049457  | G  | 0.191  | 0.1873 | A  | 0.73                 | 1.03 | <i>LTBP2</i>   | 16        |
| 14  | rs8006778  | 75071093  | A  | 0.189  | 0.186  | G  | 0.78                 | 1.02 | <i>LTBP2</i>   | 16        |
| 14  | rs888414   | 75104905  | A  | 0.1301 | 0.1368 | G  | 0.48                 | 0.94 | <i>LTBP2</i>   | 16        |
| 14  | rs12892228 | 75108290  | A  | 0.1284 | 0.1343 | G  | 0.53                 | 0.95 | <i>LTBP2</i>   | 16        |
| 14  | rs10047892 | 75111346  | A  | 0.3287 | 0.345  | G  | 0.21                 | 0.93 | <i>LTBP2</i>   | 16        |
| 15  | rs1807301  | 48910240  | A  | 0.4734 | 0.4971 | G  | 0.085                | 0.91 | <i>FBN1</i>    | 16        |
| 19  | rs4803455  | 41851509  | A  | 0.4276 | 0.4557 | C  | 0.039                | 0.89 | <i>TGFB1</i>   | 16        |
| 20  | rs6023527  | 36783599  | C  | 0.217  | 0.2054 | A  | 0.30                 | 1.07 | <i>TGM2</i>    | 16        |
| 20  | rs4811529  | 36788191  | G  | 0.3365 | 0.351  | A  | 0.27                 | 0.94 | <i>TGM2</i>    | 16        |

a: The initial finding reported by Krumbiegel et al., was in the opposite direction where the A allele conferred susceptibility to XFS.
