# Supplementary material
Source: PubMed Central journal article supplement (PMC4605818)
Supplement: NIHMS677372-supplement-Supplemental_table_4.pdf [file NIHMS677372-supplement-Supplemental_table_4.pdf]

**Supplementary Table 4**

Detailed association analysis between *CACNA1A* rs4926244 and exfoliation syndrome in all collections.

| Stage                                | Collection                | N Cases | N Controls | MAF cases | MAF cont | Study weight (%) <sup>a</sup> | OR   | P                       |                           |
|--------------------------------------|---------------------------|---------|------------|-----------|----------|-------------------------------|------|-------------------------|---------------------------|
| GWAS discovery                       | Japan - discovery         | 1484    | 1188       | 0.29      | 0.25     | 8.99                          | 1.29 | 5.5 x 10 <sup>-5</sup>  |                           |
| Validation (Stage 1)                 | Japan - validation        | 1001    | 2629       | 0.28      | 0.27     | 9.43                          | 1.04 | 0.46                    |                           |
|                                      | Singapore                 | 83      | 2553       | 0.27      | 0.20     | 3.14                          | 1.42 | 0.051                   |                           |
|                                      | Saudi Arabia              | 258     | 977        | 0.26      | 0.27     | 5.00                          | 0.95 | 0.66                    |                           |
|                                      | Greece                    | 214     | 483        | 0.27      | 0.20     | 4.26                          | 1.47 | 0.0044                  |                           |
|                                      | Turkey                    | 80      | 180        | 0.25      | 0.23     | 2.61                          | 1.15 | 0.53                    |                           |
|                                      | Mexico                    | 98      | 195        | 0.39      | 0.29     | 2.83                          | 1.54 | 0.017                   |                           |
|                                      | South Africa              | 102     | 379        | 0.27      | 0.22     | 3.14                          | 1.33 | 0.12                    |                           |
|                                      | United States             | 577     | 1208       | 0.20      | 0.15     | 6.92                          | 1.34 | 0.002                   |                           |
|                                      | Russia                    | 215     | 343        | 0.16      | 0.13     | 4.03                          | 1.29 | 0.14                    |                           |
|                                      | All Validation (Stage 1)  |         | 2628       | 8947      |          |                               |      | 1.17                    | 4.17 x 10 <sup>-5</sup>   |
| All Discovery + Validation (Stage 1) |                           | 4112    | 10135      |           |          |                               | 1.20 | 2.45 x 10 <sup>-8</sup> |                           |
| Replication (Stage 2)                | Australia                 | 291     | 2621       | 0.19      | 0.15     | 5.67                          | 1.33 | 0.011                   |                           |
|                                      | India                     | 1064    | 3536       | 0.30      | 0.27     | 10.01                         | 1.16 | 0.0066                  |                           |
|                                      | Japan - replication       | 346     | 906        | 0.31      | 0.28     | 5.54                          | 1.16 | 0.13                    |                           |
|                                      | Germany                   | 1693    | 3763       | 0.17      | 0.16     | 11.96                         | 1.09 | 0.11                    |                           |
|                                      | Italy                     | 510     | 496        | 0.18      | 0.21     | 5.55                          | 0.88 | 0.25                    |                           |
|                                      | China-Beijing             | 100     | 142        | 0.19      | 0.17     | 2.68                          | 1.12 | 0.65                    |                           |
|                                      | China-Xinjiang            | 50      | 49         | 0.17      | 0.15     | 1.74                          | 1.13 | 0.75                    |                           |
|                                      | Iran                      | 89      | 131        | 0.19      | 0.18     | 2.55                          | 1.05 | 0.84                    |                           |
|                                      | Argentina                 | 42      | 38         | 0.24      | 0.16     | 1.56                          | 1.67 | 0.21                    |                           |
|                                      | Poland                    | 88      | 98         | 0.23      | 0.14     | 2.38                          | 1.84 | 0.025                   |                           |
|                                      | All Replication (Stage 2) |         | 4273       | 11780     |          |                               |      | 1.13                    | 1.14 x 10 <sup>-4</sup>   |
|                                      | All Data                  |         | 8385       | 21915     |          |                               |      | 1.16                    | 3.36 x 10 <sup>-11b</sup> |

<sup>a</sup> Study weights are assigned as described previously by Willer CJ, Li Y, and Abecasis GR. *Bioinformatics* 2010; 26: 2190–2191.

<sup>b</sup>  $P_{het}=0.18$ ;  $I^2$  index = 22.5%
