# Supplementary material
Source: PubMed Central journal article supplement (PMC4605818)
Supplement: NIHMS677372-supplement-Supplemental_table_5.pdf [file NIHMS677372-supplement-Supplemental_table_5.pdf]

**Supplementary Table 5:** Top imputed SNPs (exceeding  $P < 0.001$ ) from the XFS GWAS using the 1000G Cosmopolitan reference panel (Phase 3 release). The vast majority are highly correlated with the index SNP rs4926244 which is shown here for reference and comparison purposes (pairwise  $D' > 0.8$  for all SNPs, and pairwise  $r^2 > 0.8$  for 10 out of 17 imputed SNPs).

| SNP        | CHR | OR   | P-value               | A1 | A2 | EAF cases | EAF controls | $r^2$ with rs4926244 | D' with rs4926244 |
|------------|-----|------|-----------------------|----|----|-----------|--------------|----------------------|-------------------|
| rs4926244  | 19  | 1.29 | $5.50 \times 10^{-5}$ | G  | A  | 0.29      | 0.25         | -                    | -                 |
| rs12151170 | 19  | 1.26 | $1.97 \times 10^{-4}$ | T  | C  | 0.29      | 0.25         | 1                    | 1                 |
| rs4926246  | 19  | 1.26 | $2.13 \times 10^{-4}$ | C  | T  | 0.29      | 0.25         | 1                    | 1                 |
| rs59384530 | 19  | 1.26 | $2.40 \times 10^{-4}$ | T  | G  | 0.29      | 0.24         | 0.99                 | 1                 |
| rs62108599 | 19  | 1.25 | $3.63 \times 10^{-4}$ | C  | T  | 0.29      | 0.25         | 1                    | 1                 |
| rs62108600 | 19  | 1.25 | $3.63 \times 10^{-4}$ | G  | A  | 0.29      | 0.25         | 1                    | 1                 |
| rs62111970 | 19  | 1.25 | $3.82 \times 10^{-4}$ | C  | T  | 0.28      | 0.24         | 0.96                 | 0.99              |
| rs61453777 | 19  | 1.26 | $3.90 \times 10^{-4}$ | T  | C  | 0.27      | 0.23         | 0.94                 | 1                 |
| rs7256827  | 19  | 1.25 | $4.09 \times 10^{-4}$ | C  | T  | 0.31      | 0.27         | 0.61                 | 0.81              |
| rs12052059 | 19  | 1.27 | $4.40 \times 10^{-4}$ | G  | C  | 0.24      | 0.20         | 0.79                 | 0.98              |
| rs7247602  | 19  | 1.26 | $6.27 \times 10^{-4}$ | T  | C  | 0.25      | 0.21         | 0.83                 | 0.98              |
| rs10412233 | 19  | 1.26 | $6.35 \times 10^{-4}$ | T  | G  | 0.24      | 0.20         | 0.79                 | 0.98              |
| rs4926241  | 19  | 1.25 | $7.14 \times 10^{-4}$ | G  | T  | 0.27      | 0.23         | 0.96                 | 0.99              |
| rs10405121 | 19  | 1.25 | $7.25 \times 10^{-4}$ | A  | G  | 0.25      | 0.21         | 0.71                 | 0.94              |
| rs3786935  | 19  | 1.26 | $7.50 \times 10^{-4}$ | A  | G  | 0.24      | 0.20         | 0.70                 | 0.95              |
| rs11085837 | 19  | 1.25 | $7.58 \times 10^{-4}$ | A  | G  | 0.25      | 0.21         | 0.73                 | 0.95              |
| rs11881621 | 19  | 1.26 | $8.07 \times 10^{-4}$ | A  | G  | 0.24      | 0.20         | 0.77                 | 0.98              |
| rs4926240  | 19  | 1.25 | $8.84 \times 10^{-4}$ | T  | C  | 0.25      | 0.21         | 0.82                 | 0.99              |

A1: Effect allele

A2: Other allele

EAF cases: Effect allele frequency in cases

EAF controls: Effect allele frequency in controls
