# Supplementary material
Source: PubMed Central journal article supplement (PMC4605818)
Supplement: NIHMS677372-supplement-Supplemental_table_6.pdf [file NIHMS677372-supplement-Supplemental_table_6.pdf]

**Supplementary Table 6.** RegulomeDB annotation of the top *LOXL1* and *CACNA1A* SNPs (rs4886776 and rs4926244 respectively, marked with an \*) and those in LD with them (1000 genomes Asians  $r^2 > 0.8$ ).

| Chr | Pos      | $r^2$ | D'   | rsID        | RefSeq gene name | dbSNP functional annotation | hits                                                                                                                                                                                                                                                  | RegulomeDB score |
|-----|----------|-------|------|-------------|------------------|-----------------------------|-------------------------------------------------------------------------------------------------------------------------------------------------------------------------------------------------------------------------------------------------------|------------------|
| 15  | 74219546 | 0.98  | 0.99 | rs1048661   | <i>LOXL1</i>     | missense; intronic          | Chromatin_Structure FAIRE, Chromatin_Structure DNase-seq, Protein_Binding ChIP-seq CREBBP, Protein_Binding ChIP-seq IKZF1, Protein_Binding ChIP-seq POLR2A, Protein_Binding ChIP-seq MYC Motifs PWM Bach2, Motifs PWM AP-1, Motifs Footprinting AP-1, | 4                |
| 15  | 74223500 | 0.99  | 1    | rs150025731 | <i>LOXL1</i>     | intronic                    | Motifs Footprinting Bach2, Motifs PWM Fos, Motifs Footprinting Fos, Chromatin_Structure DNase-seq Motifs PWM HSF2, Motifs Footprinting HSF2,                                                                                                          | 5                |
| 15  | 74223767 | 0.99  | 1    | rs1992314   | <i>LOXL1</i>     | intronic                    | Chromatin_Structure FAIRE, Chromatin_Structure DNase-seq                                                                                                                                                                                              | 5                |
| 15  | 74224996 | 1     | 1    | rs4886776*  | <i>LOXL1</i>     | intronic                    | Chromatin_Structure FAIRE, Chromatin_Structure DNase-seq                                                                                                                                                                                              | 5                |
| 15  | 74226145 | 1     | 1    | rs58270968  | <i>LOXL1</i>     | intronic                    | Chromatin_Structure DNase-seq                                                                                                                                                                                                                         | 5                |
| 15  | 74227037 | 0.93  | 1    | rs2028387   | <i>LOXL1</i>     | intronic                    | Motifs Footprinting Pax-6, Motifs PWM Pax-6, Chromatin_Structure DNase-seq, Protein_Binding ChIP-seq GATA2                                                                                                                                            | 2b               |
| 15  | 74228391 | 1     | 1    | rs4077284   | <i>LOXL1</i>     | intronic                    | Chromatin_Structure DNase-seq                                                                                                                                                                                                                         | 5                |
| 15  | 74228464 | 1     | 1    | rs893816    | <i>LOXL1</i>     | intronic                    | Motifs PWM RUNX1, Motifs PWM AML, Motifs PWM PEBP, Motifs Footprinting AML, Motifs Footprinting RUNX1, Motifs Footprinting PEBP,                                                                                                                      | 5                |
| 15  | 74229065 | 1     | 1    | rs893817    | <i>LOXL1</i>     | intronic                    | Chromatin_Structure FAIRE, Chromatin_Structure DNase-seq, Chromatin_Structure DNase-seq, Protein_Binding ChIP-seq SPI1                                                                                                                                | 4                |
| 15  | 74229195 | 1     | 1    | rs893818    | <i>LOXL1</i>     | intronic                    | Chromatin_Structure DNase-seq                                                                                                                                                                                                                         | 5                |
| 15  | 74229477 | 1     | 1    | rs67173550  | <i>LOXL1</i>     | intronic                    | Chromatin_Structure DNase-seq                                                                                                                                                                                                                         | 5                |
| 15  | 74229791 | 1     | 1    | rs4886785   | <i>LOXL1</i>     | intronic                    | Chromatin_Structure FAIRE, Chromatin_Structure DNase-seq                                                                                                                                                                                              | 5                |
| 15  | 74230660 | 0.94  | 0.98 | rs59755145  | <i>LOXL1</i>     | intronic                    | No data                                                                                                                                                                                                                                               | 7                |

|    |          |      |      |            |         |          |                                                                                                                                                                                                                                                                                                                                                                                                                                                                                                                                                                                                                                 |    |
|----|----------|------|------|------------|---------|----------|---------------------------------------------------------------------------------------------------------------------------------------------------------------------------------------------------------------------------------------------------------------------------------------------------------------------------------------------------------------------------------------------------------------------------------------------------------------------------------------------------------------------------------------------------------------------------------------------------------------------------------|----|
| 19 | 13345526 | 0.73 | 0.95 | rs11085837 | CACNA1A | intronic | Motifs Footprinting Lmo2complex,<br>Motifs PWM Lmo2complex,<br>Motifs PWM Sp4, Motifs PWM Gcm1,<br>Chromatin_Structure FAIRE,<br>Chromatin_Structure DNase-seq,<br>Protein_Binding ChIP-seq ZNF263,<br>Protein_Binding ChIP-seq GABPA,<br>Protein_Binding ChIP-seq EGR1,<br>Protein_Binding ChIP-seq MYC,<br>Protein_Binding ChIP-seq MAX,<br>Protein_Binding ChIP-seq RAD21,<br>Protein_Binding ChIP-seq ELF1,<br>Protein_Binding ChIP-seq SMC3,<br>Protein_Binding ChIP-seq STAT3,<br>Protein_Binding ChIP-seq POLR2A,<br>Protein_Binding ChIP-seq ZBTB7A,<br>Protein_Binding ChIP-seq CTCF,<br>Protein_Binding ChIP-seq CTCF | 2b |
| 19 | 13355068 | 0.79 | 0.98 | rs12052059 | CACNA1A | intronic | Chromatin_Structure DNase-seq,<br>Protein_Binding ChIP-seq ZBTB7A,<br>Protein_Binding ChIP-seq REST                                                                                                                                                                                                                                                                                                                                                                                                                                                                                                                             | 4  |
| 19 | 13337966 | 0.70 | 0.95 | rs3786935  | CACNA1A | intronic | Chromatin_Structure DNase-seq,<br>Protein_Binding ChIP-seq YY1                                                                                                                                                                                                                                                                                                                                                                                                                                                                                                                                                                  | 4  |
| 19 | 13351774 | 0.77 | 0.98 | rs11881621 | CACNA1A | intronic | Chromatin_Structure DNase-seq,<br>Protein_Binding ChIP-seq ETS1,<br>Protein_Binding ChIP-seq CTCF                                                                                                                                                                                                                                                                                                                                                                                                                                                                                                                               | 4  |
| 19 | 13351594 | 0.82 | 0.99 | rs4926240  | CACNA1A | intronic | Chromatin_Structure FAIRE,<br>Chromatin_Structure DNase-seq,<br>Protein_Binding ChIP-seq CTCF,<br>Protein_Binding ChIP-seq REST                                                                                                                                                                                                                                                                                                                                                                                                                                                                                                 | 4  |
| 19 | 13368930 | 1    | 1    | rs12151170 | CACNA1A | intronic | Chromatin_Structure DNase-seq                                                                                                                                                                                                                                                                                                                                                                                                                                                                                                                                                                                                   | 5  |
| 19 | 13375287 | 1    | 1    | rs4926246  | CACNA1A | intronic | Motifs PWM Arnt, Motifs PWM Bhlhb2,<br>Protein_Binding ChIP-seq STAT1                                                                                                                                                                                                                                                                                                                                                                                                                                                                                                                                                           | 5  |

|    |          |      |      |            |         |          |                                                                                                                                                                                                                                                                                                                                                                                                                                                                         |   |
|----|----------|------|------|------------|---------|----------|-------------------------------------------------------------------------------------------------------------------------------------------------------------------------------------------------------------------------------------------------------------------------------------------------------------------------------------------------------------------------------------------------------------------------------------------------------------------------|---|
| 19 | 13339128 | 0.71 | 0.94 | rs10405121 | CACNA1A | intronic | Motifs PWM Zfp410,<br>Chromatin_Structure DNase-seq                                                                                                                                                                                                                                                                                                                                                                                                                     | 5 |
| 19 | 13371155 | 0.99 | 1    | rs59384530 | CACNA1A | intronic | Motifs PWM FOXP1, Motifs PWM FOXJ2,<br>Motifs PWM Foxk1, Motifs PWM Zfp105,<br>Motifs PWM Foxj1, Motifs PWM FAC1                                                                                                                                                                                                                                                                                                                                                        | 6 |
| 19 | 13370986 | 1    | 1    | rs62108599 | CACNA1A | intronic | Motifs PWM FOXJ2, Motifs PWM MEF-2,<br>Motifs Footprinting MEF-2                                                                                                                                                                                                                                                                                                                                                                                                        | 6 |
| 19 | 13357525 | 0.96 | 0.99 | rs62111970 | CACNA1A | intronic | Motifs PWM ZBRK1                                                                                                                                                                                                                                                                                                                                                                                                                                                        | 6 |
| 19 | 13377081 | 0.94 | 1    | rs61453777 | CACNA1A | intronic | Motifs PWM Zbtb3                                                                                                                                                                                                                                                                                                                                                                                                                                                        | 6 |
| 19 | 13357449 | 0.96 | 0.99 | rs4926241  | CACNA1A | intronic | Motifs PWM FOXP1, Motifs PWM Srf,<br>Motifs Footprinting FOXD3,<br>Motifs PWM FOXJ2,<br>Motifs Footprinting Foxd3,<br>Motifs PWM Foxd3, Motifs PWM Foxa2,<br>Motifs PWM Zfp105,<br>Motifs Footprinting HNF3alpha,<br>Motifs PWM Tcfap2e,<br>Motifs Footprinting FOXO1,<br>Motifs PWM HNF3alpha,<br>Motifs Footprinting HNF3,<br>Motifs Footprinting FOXfactors,<br>Motifs PWM FOXD3,<br>Motifs PWM FOXfactors,<br>Motifs PWM HNF3, Motifs PWM Elf3,<br>Motifs PWM FOXO1 | 6 |
| 19 | 13374913 | NA   | NA   | rs4926244  | CACNA1A | intronic | No data                                                                                                                                                                                                                                                                                                                                                                                                                                                                 | 7 |
| 19 | 13371003 | 1    | 1    | rs62108600 | CACNA1A | intronic | No data                                                                                                                                                                                                                                                                                                                                                                                                                                                                 | 7 |
| 19 | 13329478 | 0.61 | 0.81 | rs7256827  | CACNA1A | intronic | No data                                                                                                                                                                                                                                                                                                                                                                                                                                                                 | 7 |
| 19 | 13353401 | 0.83 | 0.98 | rs7247602  | CACNA1A | intronic | No data                                                                                                                                                                                                                                                                                                                                                                                                                                                                 | 7 |
| 19 | 13354403 | 0.79 | 0.98 | rs10412233 | CACNA1A | intronic | No data                                                                                                                                                                                                                                                                                                                                                                                                                                                                 | 7 |

R<sup>2</sup> and D' values are measured between the SNP and the reported risk SNP\* within the locus in 1000 genomes Cosmopolitan (HaploReg v2)

#RegulomeDB scores indicate the amount of supporting data for regulatory effects at a single coordinate. The lower the scores, the stronger the evidence, with 2b indicating overlapping evidence for transcription factor binding, any motif, DNase footprint and DNase peak at that location, 4 indicating evidence for both transcription factor binding and DNase peak at that location, 5 indicating data for either transcription factor binding or DNase peak, 6 indicating other evidence (e.g. motifs only) and 7 indicating no supporting data for that coordinate.
