# Supplementary material
Source: PubMed Central journal article supplement (PMC4605818)
Supplement: NIHMS677372-supplement-Supplemental_table_7.pdf [file NIHMS677372-supplement-Supplemental_table_7.pdf]

**Supplementary Table 7**

Haplotypes at the *CACNA1A* locus showing association with XFS surpassing  $P < 0.0005$ . The haplotypes were phased and derived from 2 marker, 3 marker, and 4 marker sliding windows across *CACNA1A*. All haplotypes in this manner are nearly perfectly tagged by the single SNP rs4926244, suggesting that the associations observed from the haplotype analysis could be driven by rs4926244.

| <b>Haplotype</b> | <b>Frequency in XFS cases</b> | <b>Frequency in controls</b> | <b>P-value</b>         | <b>SNPS involved</b>                     |
|------------------|-------------------------------|------------------------------|------------------------|------------------------------------------|
| single locus     | 0.29                          | 0.25                         | 5.5 x 10 <sup>-5</sup> | rs4926244                                |
| AG               | 0.29                          | 0.25                         | 0.00027                | rs16031 rs4926244                        |
| GC               | 0.29                          | 0.25                         | 0.00030                | rs4926244 rs7251403                      |
| GAG              | 0.29                          | 0.25                         | 0.00027                | rs2074879 rs16031 rs4926244              |
| AGC              | 0.29                          | 0.25                         | 0.00027                | rs16031 rs4926244 rs7251403              |
| GCG              | 0.29                          | 0.25                         | 0.00027                | rs4926244 rs7251403 rs7250783            |
| CGAG             | 0.29                          | 0.25                         | 0.00021                | rs8112821 rs2074879 rs16031 rs4926244    |
| AAGC             | 0.29                          | 0.25                         | 0.00022                | rs2302080 rs1990228 rs12611099 rs8112821 |
| GAGC             | 0.29                          | 0.25                         | 0.00024                | rs2074879 rs16031 rs4926244 rs7251403    |
| AGCG             | 0.29                          | 0.25                         | 0.00027                | rs16031 rs4926244 rs7251403 rs7250783    |
| GCGG             | 0.29                          | 0.25                         | 0.00036                | rs4926244 rs7251403 rs7250783 rs7249323  |
