# Supplementary material
Source: PubMed Central journal article supplement (PMC4605818)
Supplement: NIHMS677372-supplement-Supplemental_table_8.pdf [file NIHMS677372-supplement-Supplemental_table_8.pdf]

**Supplementary Table 8**

Association results between markers at the *LOXL1* locus on Chromosome 15 at susceptibility to XFS. Shown here are all SNP markers surpassing  $1 \times 10^{-7}$  on primary association testing. Additional analyses conditioning for key *LOXL1* SNPs (rs4886776 and rs3825942) are also appended.

| SNP        | BP       | A1 | MAF cases | MAF controls | A2 | OR <sup>a</sup> | P <sup>a</sup> | OR <sup>b</sup> | P <sup>b</sup> | OR <sup>c</sup> | P <sup>c</sup> | OR <sup>d</sup> | P <sup>d</sup> |
|------------|----------|----|-----------|--------------|----|-----------------|----------------|-----------------|----------------|-----------------|----------------|-----------------|----------------|
| rs4886776  | 74224996 | G  | 0.1015    | 0.5008       | A  | 0.12            | 7.37E-137      | -               | -              | 0.13            | 2.13E-102      | -               | -              |
| rs2304721  | 74240354 | A  | 0.0465    | 0.2329       | C  | 0.16            | 9.79E-67       | 0.93            | 0.61           | 0.14            | 4.00E-71       | 0.77            | 0.12           |
| rs4461027  | 74211548 | G  | 0.1115    | 0.3123       | A  | 0.26            | 2.65E-62       | 0.94            | 0.57           | 0.25            | 9.18E-63       | 0.86            | 0.21           |
| rs12438872 | 74177764 | G  | 0.1462    | 0.3492       | A  | 0.31            | 3.59E-58       | 0.85            | 0.087          | 0.34            | 7.53E-46       | 0.83            | 0.053          |
| rs4886725  | 74171006 | G  | 0.1459    | 0.3338       | A  | 0.33            | 2.83E-52       | 0.87            | 0.12           | 0.35            | 6.07E-45       | 0.84            | 0.058          |
| rs4886693  | 74141238 | G  | 0.1349    | 0.316        | A  | 0.34            | 1.12E-49       | 0.83            | 0.048          | 0.35            | 3.27E-42       | 0.81            | 0.024          |
| rs8042039  | 74225518 | A  | 0.02596   | 0.1532       | G  | 0.14            | 5.28E-48       | 0.82            | 0.22           | -               | -              | -               | -              |
| rs1078967  | 74222987 | A  | 0.02561   | 0.1529       | G  | 0.14            | 6.52E-48       | 0.81            | 0.19           | 0.78            | 0.75           | 1.19            | 0.84           |
| rs4445847  | 74172013 | A  | 0.1267    | 0.2971       | G  | 0.33            | 1.20E-47       | 0.85            | 0.088          | 0.31            | 1.42E-48       | 0.80            | 0.023          |
| rs3825942  | 74219582 | A  | 0.02594   | 0.1521       | G  | 0.14            | 1.32E-47       | 0.82            | 0.21           | -               | -              | -               | -              |
| rs8041685  | 74225193 | A  | 0.0192    | 0.1066       | G  | 0.14            | 7.30E-35       | 0.85            | 0.37           | 1.08            | 0.79           | 1.15            | 0.64           |
| rs999742   | 74115517 | G  | 0.285     | 0.4537       | A  | 0.48            | 3.45E-33       | 0.98            | 0.77           | 0.49            | 2.18E-29       | 0.96            | 0.59           |
| rs12101466 | 74248388 | G  | 0.1924    | 0.3527       | A  | 0.45            | 5.33E-33       | 1.07            | 0.44           | 0.58            | 5.57E-15       | 1.09            | 0.35           |
| rs7179978  | 74200358 | A  | 0.09048   | 0.2113       | G  | 0.36            | 1.09E-32       | 0.77            | 0.011          | 0.35            | 7.75E-32       | 0.74            | 0.0042         |
| rs4886647  | 74110101 | G  | 0.2844    | 0.4516       | A  | 0.49            | 1.17E-32       | 0.97            | 0.67           | 0.49            | 3.78E-29       | 0.95            | 0.49           |
| rs1452389  | 74138822 | A  | 0.127     | 0.2614       | G  | 0.41            | 6.47E-32       | 0.86            | 0.11           | 0.45            | 4.03E-24       | 0.86            | 0.092          |
| rs8029844  | 74193472 | A  | 0.09299   | 0.2117       | G  | 0.37            | 2.48E-31       | 0.79            | 0.025          | 0.36            | 8.67E-31       | 0.76            | 0.010          |
| rs8030745  | 74133091 | G  | 0.1224    | 0.2538       | A  | 0.42            | 9.72E-31       | 0.84            | 0.064          | 0.45            | 1.46E-23       | 0.83            | 0.051          |
| rs4886425  | 74124543 | A  | 0.124     | 0.2559       | G  | 0.42            | 1.11E-30       | 0.83            | 0.050          | 0.45            | 1.06E-23       | 0.83            | 0.040          |
| rs2165241  | 74222202 | A  | 0.02832   | 0.1128       | G  | 0.21            | 1.45E-30       | 1.30            | 0.10           | 0.19            | 1.43E-32       | 1.23            | 0.22           |
| rs750460   | 74241506 | A  | 0.02898   | 0.1124       | G  | 0.22            | 2.23E-30       | 1.32            | 0.082          | 0.20            | 6.33E-32       | 1.26            | 0.18           |
| rs16958445 | 74176557 | A  | 0.0566    | 0.1574       | G  | 0.31            | 2.30E-30       | 0.83            | 0.13           | 0.27            | 5.25E-34       | 0.78            | 0.048          |
| rs2507     | 74275676 | G  | 0.1863    | 0.3333       | A  | 0.47            | 2.67E-29       | 1.09            | 0.33           | 0.61            | 6.05E-12       | 1.11            | 0.24           |
| rs11636934 | 74275170 | G  | 0.1867    | 0.3325       | A  | 0.47            | 5.11E-29       | 1.09            | 0.32           | 0.61            | 7.70E-12       | 1.11            | 0.24           |
| rs1452388  | 74139078 | G  | 0.1046    | 0.2241       | A  | 0.40            | 6.50E-29       | 0.84            | 0.076          | 0.39            | 3.83E-29       | 0.81            | 0.036          |
| rs10519015 | 74125955 | A  | 0.1012    | 0.2201       | G  | 0.40            | 1.14E-28       | 0.81            | 0.038          | 0.38            | 5.97E-29       | 0.78            | 0.017          |
| rs746655   | 74107677 | A  | 0.1032    | 0.2222       | G  | 0.40            | 1.64E-28       | 0.80            | 0.028          | 0.39            | 6.82E-29       | 0.78            | 0.012          |
| rs4886782  | 74228810 | A  | 0.02561   | 0.1023       | G  | 0.22            | 1.15E-27       | 1.28            | 0.14           | 0.20            | 1.14E-28       | 1.21            | 0.27           |

|            |          |   |         |         |   |      |          |      |       |      |          |      |       |
|------------|----------|---|---------|---------|---|------|----------|------|-------|------|----------|------|-------|
| rs1869177  | 74160556 | A | 0.09333 | 0.2041  | G | 0.40 | 6.02E-27 | 0.80 | 0.027 | 0.39 | 1.19E-26 | 0.77 | 0.013 |
| rs10851869 | 74331083 | G | 0.1951  | 0.3312  | A | 0.51 | 6.98E-25 | 1.13 | 0.17  | 0.65 | 1.21E-09 | 1.15 | 0.12  |
| rs12437465 | 74243246 | A | 0.3575  | 0.5051  | G | 0.55 | 1.95E-24 | 1.00 | 0.98  | 0.41 | 3.14E-43 | 0.94 | 0.46  |
| rs3784556  | 74332188 | A | 0.1038  | 0.2125  | C | 0.44 | 8.40E-24 | 1.12 | 0.30  | 0.64 | 5.69E-07 | 1.15 | 0.19  |
| rs2289412  | 74276092 | A | 0.07918 | 0.1771  | G | 0.42 | 5.35E-22 | 1.08 | 0.52  | 0.57 | 1.15E-08 | 1.10 | 0.43  |
| rs2289413  | 74276228 | G | 0.07918 | 0.1768  | A | 0.42 | 6.78E-22 | 1.08 | 0.50  | 0.57 | 1.34E-08 | 1.10 | 0.42  |
| rs1963477  | 74091872 | A | 0.1203  | 0.218   | G | 0.48 | 3.05E-20 | 0.89 | 0.24  | 0.50 | 2.19E-17 | 0.88 | 0.19  |
| rs4272992  | 74172153 | G | 0.03136 | 0.08923 | A | 0.29 | 4.84E-20 | 1.05 | 0.77  | 0.26 | 2.26E-22 | 0.99 | 0.93  |
| rs4886717  | 74165128 | A | 0.03201 | 0.09007 | G | 0.30 | 9.03E-20 | 1.06 | 0.70  | 0.26 | 3.75E-22 | 1.00 | 0.99  |
| rs4886467  | 74198813 | A | 0.01887 | 0.07323 | C | 0.23 | 9.05E-20 | 0.96 | 0.84  | 0.20 | 2.59E-21 | 0.90 | 0.57  |
| rs11639300 | 74176277 | A | 0.01922 | 0.0686  | G | 0.24 | 8.10E-18 | 1.04 | 0.85  | 0.22 | 3.93E-19 | 0.97 | 0.88  |
| rs17773784 | 74080674 | G | 0.1375  | 0.2281  | A | 0.53 | 1.78E-17 | 0.89 | 0.21  | 0.53 | 1.58E-15 | 0.88 | 0.17  |
| rs1823718  | 74147244 | G | 0.02796 | 0.07828 | A | 0.30 | 2.67E-17 | 1.03 | 0.89  | 0.27 | 1.94E-19 | 0.96 | 0.83  |
| rs11072447 | 74166455 | G | 0.02768 | 0.07806 | A | 0.30 | 2.82E-17 | 1.02 | 0.90  | 0.26 | 1.35E-19 | 0.96 | 0.80  |
| rs4886617  | 74089793 | C | 0.4896  | 0.3683  | A | 1.64 | 3.12E-17 | 1.11 | 0.14  | 1.55 | 7.57E-13 | 1.11 | 0.13  |
| rs4886616  | 74089733 | A | 0.4906  | 0.3716  | G | 1.61 | 1.73E-16 | 1.11 | 0.15  | 1.53 | 2.80E-12 | 1.11 | 0.15  |
| rs896598   | 74036629 | A | 0.4768  | 0.3586  | G | 1.61 | 2.66E-16 | 1.02 | 0.82  | 1.50 | 3.28E-11 | 1.02 | 0.83  |
| rs4886621  | 74092804 | A | 0.44    | 0.3237  | G | 1.61 | 5.77E-16 | 1.12 | 0.12  | 1.56 | 4.94E-13 | 1.12 | 0.10  |
| rs4887140  | 74046663 | C | 0.4714  | 0.3552  | A | 1.60 | 1.01E-15 | 1.01 | 0.84  | 1.50 | 6.42E-11 | 1.01 | 0.85  |
| rs4886809  | 74258449 | A | 0.4468  | 0.3256  | G | 1.59 | 3.15E-15 | 1.01 | 0.93  | 1.53 | 7.09E-12 | 1.01 | 0.85  |
| rs3784563  | 74290993 | A | 0.4353  | 0.319   | C | 1.58 | 1.09E-14 | 1.02 | 0.75  | 1.54 | 7.87E-12 | 1.03 | 0.66  |
| rs16958237 | 74075608 | A | 0.1584  | 0.2449  | G | 0.58 | 6.04E-14 | 0.94 | 0.52  | 0.64 | 3.06E-09 | 0.95 | 0.54  |
| rs7173049  | 74244610 | G | 0.2156  | 0.3102  | A | 0.62 | 1.50E-13 | 1.03 | 0.74  | 0.72 | 2.13E-06 | 1.03 | 0.72  |
| rs723434   | 74343330 | G | 0.4067  | 0.3039  | A | 1.54 | 6.20E-13 | 1.02 | 0.81  | 1.40 | 7.44E-08 | 1.02 | 0.81  |
| rs3522     | 74244344 | G | 0.4114  | 0.322   | A | 1.52 | 2.29E-12 | 1.02 | 0.75  | 1.26 | 0.000172 | 1.01 | 0.87  |
| rs531019   | 73598607 | A | 0.3063  | 0.4049  | G | 0.67 | 2.04E-11 | 0.89 | 0.11  | 0.71 | 8.05E-08 | 0.89 | 0.11  |
| rs12442096 | 74038773 | A | 0.4235  | 0.5181  | G | 0.69 | 7.12E-11 | 0.97 | 0.68  | 0.74 | 4.83E-07 | 0.97 | 0.70  |
| rs1478558  | 74116224 | A | 0.04144 | 0.08123 | G | 0.45 | 2.07E-10 | 1.14 | 0.39  | 0.41 | 2.57E-12 | 1.09 | 0.57  |
| rs2415231  | 74116864 | A | 0.04144 | 0.08123 | G | 0.45 | 2.07E-10 | 1.14 | 0.39  | 0.41 | 2.57E-12 | 1.09 | 0.57  |
| rs7169087  | 74068380 | A | 0.5243  | 0.4356  | G | 1.43 | 4.96E-10 | 1.01 | 0.93  | 1.46 | 5.40E-10 | 1.02 | 0.83  |
| rs11072405 | 73485160 | A | 0.345   | 0.4358  | G | 0.70 | 6.42E-10 | 0.91 | 0.19  | 0.74 | 1.53E-06 | 0.91 | 0.20  |
| rs2415145  | 73540362 | G | 0.3514  | 0.4423  | A | 0.70 | 9.29E-10 | 0.91 | 0.20  | 0.75 | 2.11E-06 | 0.91 | 0.21  |
| rs746654   | 74107712 | A | 0.04178 | 0.08039 | G | 0.47 | 1.10E-09 | 1.09 | 0.56  | 0.42 | 1.28E-11 | 1.05 | 0.77  |
| rs13638    | 74181538 | G | 0.02123 | 0.05219 | A | 0.37 | 1.17E-09 | 1.01 | 0.96  | 1.00 | 1.00     | 1.13 | 0.55  |
| rs3784807  | 73631830 | G | 0.4538  | 0.545   | A | 0.71 | 3.10E-09 | 0.92 | 0.24  | 0.72 | 3.34E-08 | 0.92 | 0.22  |
| rs1979409  | 73465477 | A | 0.1375  | 0.2012  | G | 0.63 | 3.30E-09 | 0.81 | 0.030 | 0.64 | 2.58E-08 | 0.81 | 0.025 |

|            |          |   |        |         |   |      |          |      |        |      |          |      |        |
|------------|----------|---|--------|---------|---|------|----------|------|--------|------|----------|------|--------|
| rs1564239  | 74073647 | A | 0.4292 | 0.5114  | G | 0.71 | 3.46E-09 | 1.00 | 0.99   | 0.73 | 1.46E-07 | 0.99 | 0.91   |
| rs2415230  | 74059081 | A | 0.5219 | 0.4373  | G | 1.40 | 3.84E-09 | 0.99 | 0.85   | 1.43 | 3.55E-09 | 1.00 | 0.95   |
| rs12917099 | 74028569 | A | 0.5296 | 0.4465  | G | 1.39 | 7.16E-09 | 1.01 | 0.90   | 1.31 | 5.11E-06 | 1.01 | 0.90   |
| rs1542544  | 74020740 | G | 0.5313 | 0.4487  | A | 1.38 | 8.67E-09 | 1.02 | 0.83   | 1.31 | 6.03E-06 | 1.01 | 0.84   |
| rs2218949  | 74075536 | A | 0.4279 | 0.5076  | G | 0.72 | 1.29E-08 | 1.00 | 0.97   | 0.74 | 4.57E-07 | 1.00 | 0.96   |
| rs12905211 | 73628168 | A | 0.2224 | 0.2982  | G | 0.69 | 1.68E-08 | 0.85 | 0.052  | 0.66 | 2.72E-09 | 0.85 | 0.043  |
| rs1038094  | 74012437 | G | 0.4531 | 0.5341  | A | 0.73 | 1.81E-08 | 1.00 | 0.97   | 0.77 | 1.90E-05 | 1.00 | 0.96   |
| rs6495042  | 73282726 | A | 0.5313 | 0.4532  | G | 1.36 | 3.29E-08 | 1.18 | 0.014  | 1.30 | 6.97E-06 | 1.18 | 0.013  |
| rs1900901  | 73257725 | A | 0.5337 | 0.4562  | G | 1.36 | 3.63E-08 | 1.18 | 0.015  | 1.30 | 6.75E-06 | 1.18 | 0.014  |
| rs17762600 | 73488753 | A | 0.2294 | 0.3018  | C | 0.70 | 5.14E-08 | 0.89 | 0.13   | 0.73 | 5.25E-06 | 0.89 | 0.13   |
| rs11632630 | 73254545 | C | 0.0438 | 0.07955 | A | 0.51 | 5.19E-08 | 0.67 | 0.0076 | 0.47 | 3.31E-09 | 0.66 | 0.0049 |
| rs488156   | 73625895 | G | 0.3827 | 0.4693  | A | 0.73 | 5.77E-08 | 0.91 | 0.20   | 0.76 | 7.31E-06 | 0.91 | 0.21   |
| rs7164592  | 73276931 | C | 0.4431 | 0.5181  | A | 0.74 | 9.15E-08 | 0.85 | 0.020  | 0.77 | 8.79E-06 | 0.85 | 0.018  |
| rs4238458  | 73250485 | G | 0.5243 | 0.4503  | A | 1.35 | 9.34E-08 | 1.17 | 0.019  | 1.29 | 1.21E-05 | 1.17 | 0.018  |

a: Unconditioned OR and P

b: Conditioned for rs4886776

c: Conditioned for rs3825942

d: Conditioned for both rs4886776 and rs3825942

A1: Minor allele; A2: Major allele.
